# Supplementary material
Source: publisher figshare collection journal article supplement (https://acs.figshare.com/ndownloader/files/5768541)

## Supporting Information for:

**Cooperative Chemical Sensing with bis-Tritylacetylenes: Pinwheel Receptors with Metal Ion Recognition Properties**

Timothy E. Glass

*Department of Chemistry, The Pennsylvania State University, University Park, PA 16802*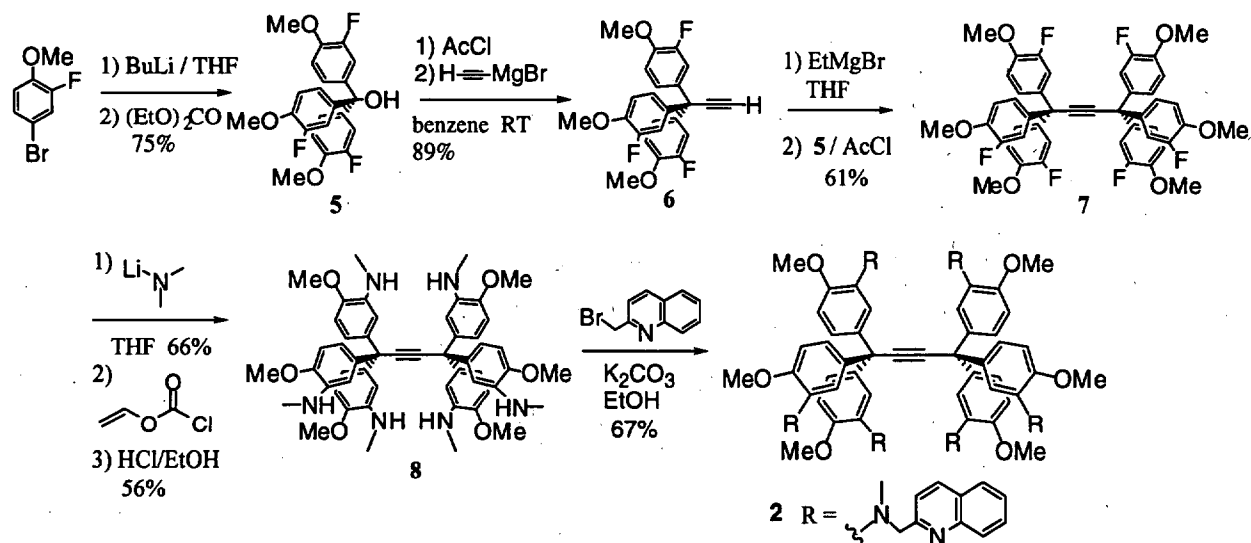

Synthesis of sensor **2** began by construction of trityl alcohol **5** from the lithiate of bromofluoroanisole (Scheme 1). The fluorine substituent is beneficial in that it offers negligible steric constraints and is readily substituted by amide nucleophiles.<sup>1</sup> Initial synthetic work indicated that even groups of moderate steric size at this position inhibited the formation of the highly congested framework. Chlorination of alcohol **5** followed by addition of ethynyl magnesium bromide provided the monotrityl acetylene **6** in good yield.<sup>2</sup> Deprotonation of the alkyne hydrogen in **6**, followed by the addition of a further equivalent of the trityl chloride derived from **5**, provided the bistrityl acetylene **7** in moderate yield. At this stage, the hexafluorinated compound **7** was treated with the lithium amide of methylamine in an effort to produce compound **8** directly. However, this reaction failed under a variety of conditions, returning only unreacted starting material. The transformation was successfully completed using a two step process. Addition of excess lithium dimethyl amide gave the hexadimethylaniline in good yield. The rationale for including the methoxy substituent is now apparent as it is necessary to avoid regiochemical complications due to potential benzyne formation in this reaction. Selective mono-dealkylation of the dimethylaniline moieties was accomplished using a modification of an Olofson procedure to yield compound **8**.<sup>3</sup> Alkylation with the known bromomethylquinoline<sup>4</sup> afforded the final sensor **2**. Compound **3** was prepared using obvious extensions of this procedure. Compound **4** was prepared from bisanilinoethane according to the method of Steiman.<sup>4</sup>

### General Methods

All reactions were carried out in oven dried glassware under an argon atmosphere. Tetrahydrofuran (THF) and benzene were distilled from sodium benzophenone ketyl under argon immediately before use. Toluene was distilled from sodium under argon immediately before use. Flash chromatography<sup>5</sup> was performed with 32-63  $\mu\text{m}$  silica gel. All melting points are uncorrected. NMR spectra were recorded on a Bruker AMX-360 or DRX-400 NMR using TMS as a reference.

#### Tris(3-fluoro-4-methoxyphenyl)carbinol (5)

2-Fluoro-4-bromoanisole (12.6 ml, 99.6 mmol) and THF (400 ml) were placed in a 1000 ml round bottom flask under argon and cooled to  $-78^{\circ}\text{C}$ . n-Butyl lithium (65 ml, 1.6 M, 99.6 mmol) was added over 10 minutes. The reaction stirred for 5 minutes and diethyl carbonate (3.54 ml, 29.2 mmol) was added via syringe. The reaction was allowed to warm to  $0^{\circ}\text{C}$  over 1 hour. Saturated  $\text{NH}_4\text{Cl}$  solution (200 ml) was added. The mixture was extracted with ether (3 x 100 ml), dried over  $\text{MgSO}_4$  and concentrated. The residue was chromatographed on silica with a gradient of 20-35% ethyl acetate in hexane to afford compound 5 as a yellow oil (10.6 g, 75% yield) which solidified upon standing. m.p. =  $99-101^{\circ}\text{C}$ ;  $^1\text{H}$  NMR ( $\text{CDCl}_3$ , 360 MHz)  $\delta$  7.01 (dd,  $J_{\text{H-F}} = 12.3$ ,  $J_{\text{H-H}} = 1.8$  Hz, 3 H), 6.93 (dd,  $J = 8.7$ , 2.3 Hz, 3H), 6.89 (t,  $J_{\text{H-F}} = J_{\text{H-H}} = 8.7$  Hz, 3H), 3.89 (s, 9H), 2.67 (s, 1H);  $^{13}\text{C}$  NMR ( $\text{CDCl}_3$ , 100 MHz)  $\delta$  151.8 (d,  $J_{\text{C-F}} = 246$  Hz), 146.9 (d,  $J_{\text{C-F}} = 10.7$  Hz), 139.4 (d,  $J_{\text{C-F}} = 4.9$  Hz), 123.5 (d,  $J_{\text{C-F}} = 3.9$  Hz), 115.8 (d,  $J_{\text{C-F}} = 20.4$  Hz), 112.7, 80.3, 56.3; IR (neat) 3500, 2937, 2842, 1512, 1274, 1123, 1027, 799, 762  $\text{cm}^{-1}$ ; CIMS (relative intensity)  $m/z$  405 ( $\text{MH}^+$ , 48), 387 (M-OH, 100); HMRS calcd. for  $\text{C}_{22}\text{H}_{18}\text{F}_3\text{O}_3$  (M-OH): 387.1208, found: 387.1196.

#### 3,3,3-Tris(3-fluoro-4-methoxyphenyl)propyne (6)

Compound 5 (1.7 g, 4.2 mmol) and acetyl chloride (20 ml) were placed in a 250 ml round bottom flask fitted with a drying tube and stirred at room temperature for 2 hours. The acetyl chloride was removed in vacuo. Toluene (60 ml) was added and removed in vacuo (to remove the last traces of acetic acid). Toluene (125 ml) was then added. The reaction was cooled to  $-78^{\circ}\text{C}$  and ethynyl magnesium bromide (15 ml, 0.5 M in THF, 7.5 mmol) was then added via syringe. The reaction was allowed to warm to room temperature over night. Saturated  $\text{NH}_4\text{Cl}$  solution (100 ml) was added. The mixture was extracted with ether (3 x 75 ml), dried over  $\text{MgSO}_4$  and concentrated. The residue was chromatographed on silica with 20% ethyl acetate in hexane to afford compound 6 as an off-white solid (1.54 g, 89% yield). m.p. =  $135-137^{\circ}\text{C}$ ;  $^1\text{H}$  NMR ( $\text{CDCl}_3$ , 360 MHz)  $\delta$  7.00 (dd,  $J_{\text{H-F}} = 12.5$ ,  $J_{\text{H-H}} = 2.3$  Hz, 3H), 6.92 (dd,  $J = 8.7$ , 2.3 Hz, 3H), 6.87 (t,  $J_{\text{H-F}} = J_{\text{H-H}} = 8.7$  Hz, 3H), 3.89 (s, 9H), 2.73 (s, 1H);  $^{13}\text{C}$  NMR ( $\text{CDCl}_3$ , 100 MHz)  $\delta$  151.9 (d,  $J_{\text{C-F}} = 246$  Hz), 146.7 (d,  $J_{\text{C-F}} = 10.7$  Hz), 137.2 (d,  $J_{\text{C-F}} = 5.8$  Hz), 124.5, 116.9 (d,  $J_{\text{C-F}} = 20.4$  Hz), 112.7, 88.6, 74.0, 56.3, 52.9; IR (neat) 3296, 2936, 2841, 1511, 1278, 1122, 1027, 762  $\text{cm}^{-1}$ ; HMRS calcd. for  $\text{C}_{24}\text{H}_{19}\text{F}_3\text{O}_3$  ( $\text{MH}^+$ ): 413.1365, found: 413.1361.

#### 1,1,1,4,4,4-Hexakis(3-fluoro-4-methoxyphenyl)butyne (7)

Compound 5 (1.0 g, 2.47 mmol) and acetyl chloride (10 ml) were placed in a 250 ml round bottom flask fitted with a drying tube and stirred at room temperature for 1 hour. The acetyl chloride was removed in vacuo and toluene (60 ml) was added. The solvent was removed in vacuo (to remove the last traces of acetic acid) and toluene (60 ml) was added. Compound 6 (963 mg, 2.34 mmol) and THF (8 ml)

were placed in a separate 25 ml pear shaped flask under argon. Ethyl magnesium bromide (0.78 ml, 3 M in ether, 2.34 mmol) was added via syringe and the reaction was stirred for 2 hours. The THF solution was then transferred via cannula to the toluene solution and the reaction was stirred at room temperature overnight, then heated to 40°C for 3 hours. Saturated  $\text{NH}_4\text{Cl}$  (50 ml) solution was added. The mixture was extracted with ether (3 x 50 ml), dried over  $\text{MgSO}_4$  and concentrated. The residue was chromatographed on silica with a gradient of 30-40% ethyl acetate in hexane to afford compound **7** as a white solid (1.14 g, 61% yield). m.p. = 88-89 °C;  $^1\text{H}$  NMR ( $\text{CDCl}_3$ , 400 MHz)  $\delta$  7.00 (d,  $J$  = 13.7 Hz, 6H), 6.89-6.84 (m, 12H), 3.89 (s, 18H);  $^{13}\text{C}$  NMR ( $\text{CDCl}_3$ , 100 MHz)  $\delta$  151.9 (d,  $J_{\text{C-F}}$  = 247 Hz), 146.7 (d,  $J_{\text{C-F}}$  = 10.8 Hz), 137.7 (d,  $J_{\text{C-F}}$  = 5.4 Hz), 124.5 (d,  $J_{\text{C-F}}$  = 3.6 Hz), 116.9 (d,  $J_{\text{C-F}}$  = 19.7 Hz), 112.8, 90.4, 56.3, 53.7; IR (neat) 2935, 2840, 1510, 1276, 1122, 1028, 762  $\text{cm}^{-1}$ ; CIMS (relative intensity)  $m/z$  798 ( $\text{M}^+$ , 48), 387 (100); Anal. Calcd for  $\text{C}_{46}\text{H}_{36}\text{F}_6\text{O}_6$ : C, 69.17; H, 4.54. Found: C, 68.93; H, 4.64.

### 1,1,1,4,4,4-Hexakis(3-methylamino-4-methoxyphenyl)but-2-yne (**8**)

Compound **7** (250 mg, 0.313 mmol) and THF (50 ml) were placed in a 250 ml round bottom flask under argon and cooled to -78°C. Lithium dimethylamide (2.35 ml, 10% dispersion in hexanes, 3.13 mmol) was added via syringe. The reaction was allowed to warm to room temperature overnight. Saturated  $\text{NaHCO}_3$  solution (50 ml) was added. The mixture was extracted with ether (3 x 50 ml), dried over  $\text{MgSO}_4$  and concentrated. The residue was chromatographed on silica with 6:8:1 ethyl acetate : hexane : triethyl amine to afford 1,1,1,4,4,4-Hexakis(3-dimethylamino-4-methoxyphenyl)but-2-yne as an off white solid (197 mg, 66% yield). m. p. = 73-76°C;  $^1\text{H}$  NMR ( $\text{CDCl}_3$ , 400 MHz)  $\delta$  6.97 (d,  $J$  = 2.0 Hz, 6H), 6.75 (dd,  $J$  = 8.2, 2.0 Hz, 6H), 6.68 (d,  $J$  = 8.5 Hz, 6H), 3.84 (s, 18H), 2.52 (s, 36H);  $^{13}\text{C}$  NMR ( $\text{CDCl}_3$ , 100 MHz)  $\delta$  150.8, 141.4, 138.6, 122.8, 119.5, 109.7, 91.4, 55.3, 54.6, 43.2; IR (neat) 2943, 2828, 2780, 1505, 1241, 1195, 1119, 1030, 727  $\text{cm}^{-1}$ ; HMRS calcd. for  $\text{C}_{58}\text{H}_{73}\text{N}_6\text{O}_6$  ( $\text{MH}^+$ ): 949.5592, found: 949.5583; Anal. Calcd for  $\text{C}_{58}\text{H}_{72}\text{N}_6\text{O}_6$ : C, 73.39; H, 7.65; N, 8.85. Found: C, 73.36; H, 7.79; N, 8.79.

1,1,1,4,4,4-Hexakis(3-dimethylamino-4-methoxyphenyl)but-2-yne (77 mg, 0.081 mmol) and vinyl chloroformate (1 ml) were placed in a 10 ml resealable tube which was flushed with argon and sealed. The tube was heated to 115°C in an oil bath for 3 hours. The mixture was concentrated and the residue was taken up in ethanol (8 ml).  $\text{HCl}$  (conc, 4 ml) was added and the reaction heated to 50°C for 5 hours. The reaction was cooled, basified with aqueous  $\text{NaOH}$  and extracted with  $\text{CH}_2\text{Cl}_2$ . The extracts were dried over  $\text{MgSO}_4$  and concentrated. Chromatography on silica with 3:7:1 ethyl acetate : hexane : triethyl amine afforded compound **8** as a white solid (39 mg, 56% yield). m. p. = 265 °C (dec.);  $^1\text{H}$  NMR ( $\text{CDCl}_3$ , 360 MHz)  $\delta$  6.97 (d,  $J$  = 2.0 Hz, 6H), 6.75 (dd,  $J$  = 8.2, 2.0 Hz, 6H), 6.68 (d,  $J$  = 8.5 Hz, 6H), 3.84 (s, 18H), 2.52 (s, 18H);  $^{13}\text{C}$  NMR ( $\text{CDCl}_3$ , 100 MHz)  $\delta$  145.3, 139.8, 138.3, 117.3, 111.7, 107.9, 91.6, 55.4, 55.3, 30.1; IR (neat) 3411, 2933, 1602, 1520, 1258, 1226, 1164, 1030  $\text{cm}^{-1}$ ; HMRS calcd. for  $\text{C}_{52}\text{H}_{60}\text{N}_6\text{O}_6$  ( $\text{MH}^+$ ): 865.4653, found: 865.4662.

**1,1,1,4,4,4-Hexakis(3-(N-methyl-N-(quinoline-2-methyl)amino)-4-methoxyphenyl)but-2-yne (2)**

Compound 8 (39 mg, 0.045 mmol), bromomethylquinoline (204 mg, 0.92 mmol),  $K_2CO_3$  (128 mg, 0.92 mmol) and ethanol (10 ml) were placed in a round bottom flask with a condenser and drying tube. The reaction was heated to 50 °C for 5 hours. The solvent was removed in vacuo and the residue was chromatographed on silica with 15 : 4 : 1 ethyl acetate : hexane : triethyl amine to afford compound 2 as a light yellow oil (52 mg, 67% yield).  $^1H$  NMR ( $CDCl_3$ , 360 MHz)  $\delta$  8.01 (d,  $J$  = 8.7 Hz, 6H), 7.95 (d,  $J$  = 8.2 Hz, 6H), 7.72 (d,  $J$  = 8.2 Hz, 6H), 7.62 (td,  $J$  = 6.8, 1.3 Hz, 6H), 7.60 (d,  $J$  = 8.7 Hz, 6H), 7.44 (td,  $J$  = 8.0, 1.3 Hz, 6H), 7.04 (d,  $J$  = 2.3 Hz, 6H), 6.70 (dd,  $J$  = 8.2, 2.3 Hz, 6H), 6.56 (d,  $J$  = 8.2 Hz, 6H), 4.34 (s, 12H), 3.75 (s, 18H), 2.38 (s, 18H).  $^{13}C$  NMR ( $CDCl_3$ , 100 MHz)  $\delta$  160.9, 150.5, 147.4, 140.6, 138.6, 136.1, 129.1, 128.9, 127.4, 127.3, 125.8, 122.3, 120.8, 120.1, 110.1, 91.6, 61.8, 55.4, 54.6, 39.3. IR (neat) 3060, 2934, 2834, 1599, 1503, 1241, 1147, 1241, 1147, 1029, 910, 830, 731  $cm^{-1}$ ; HMRS calcd. for  $C_{112}H_{102}N_{12}O_6$  ( $M^+$ ): 1710.8045, found: 1170.8047.

**3,3,3-Tris(3-dimethylamino-4-methoxyphenyl)propyne**

Compound 6 (250 mg, 0.607 mmol) and THF (75 ml) were placed in a 250 ml round bottom flask under argon and cooled to -78°C. Lithium dimethylamide (9.1 ml, 10% dispersion in hexanes, 12.1 mmol) was added via syringe. The reaction was allowed to warm to room temperature overnight. Saturated  $NaHCO_3$  solution (50 ml) was added. The mixture was extracted with ether (3 x 50 ml), dried over  $MgSO_4$  and concentrated. The residue was chromatographed on silica with 10-20% ether in dichloromethane to afford the title compound as an oil (128 mg, 43% yield).  $^1H$  NMR ( $CDCl_3$ , 360 MHz)  $\delta$  6.86 (d,  $J$  = 2.3 Hz, 3H), 6.70 (dd,  $J$  = 8.2, 2.3 Hz, 3H), 6.65 (d,  $J$  = 8.6 Hz, 3H), 3.78 (s, 9H), 2.61 (s, 18H), 2.59 (s, 1H);  $^{13}C$  NMR ( $CDCl_3$ , 90 MHz)  $\delta$  151.0, 141.5, 137.6, 122.8, 119.4, 109.8, 90.5, 72.5, 55.2, 54.1, 43.2; IR (neat) 3279, 2941, 2829, 2780, 1597, 1504, 1461, 1242, 1196, 1119, 1029, 727  $cm^{-1}$ ; HMRS calcd. for  $C_{30}H_{38}N_3O_3$  ( $MH^+$ ): 488.2913, found: 488.2898.

**3,3,3-Tris(3-methylamino-4-methoxyphenyl)propyne**

3,3,3-Tris(3-dimethylamino-4-methoxyphenyl)propyne (74 mg, 0.152 mmol) and vinyl chloroformate (1 ml) were placed in a 10 ml resealable tube which was flushed with argon and sealed. The tube was heated to 115°C in an oil bath for 4 hours. The mixture was concentrated and the residue was taken up in ethanol (8 ml). HCl (conc, 4 ml) was added and the reaction heated to 50°C for 5 hours. The reaction was cooled, basified with aqueous NaOH (aq.) and extracted with  $CH_2Cl_2$ . The extracts were dried over  $MgSO_4$  and concentrated. Chromatography on silica with 0-2% ethyl ether in dichloromethane afforded the title compound as an oil (36 mg, 53% yield).  $^1H$  NMR ( $CDCl_3$ , 360 MHz)  $\delta$  6.75 (d,  $J$  = 2.3 Hz, 3H), 6.60 (d,  $J$  = 8.2 Hz, 3H), 6.43 (dd,  $J$  = 8.2, 2.3 Hz, 3H), 3.81 (s, 9H), 2.74 (s, 9H), 2.64 (s, 1H);  $^{13}C$  NMR ( $CDCl_3$ , 100 MHz)  $\delta$  145.7, 138.6, 138.5, 117.3, 111.1, 108.0, 91.3, 72.1, 55.4, 54.8, 30.4; IR (neat) 3426, 3281, 2935, 1602, 1520, 1409, 1258, 1227, 1164, 1029, 909, 789, 731  $cm^{-1}$ ; HMRS calcd. for  $C_{27}H_{32}N_3O_3$  ( $MH^+$ ): 446.2444, found: 446.2409.

**3,3,3-Tris(3-(N-methyl-N-(quinoline-2-methyl)amino)-4-methoxyphenyl)propyne (3)**

3,3,3-Tris(3-methylamino-4-methoxyphenyl)propyne (36 mg, 0.081 mmol), bromomethylquinoline (179 mg, 0.81 mmol),  $K_2CO_3$  (112 mg, 0.81 mmol) and ethanol (4 ml) were placed in a round bottom

flask with a condenser and drying tube. The reaction was heated to 50 °C for 2 hours and allow to stir at room temperature over night. The solvent was removed in vacuo and the residue was chromatographed on silica with 40% ethyl ether in methylene chloride to afford compound **3** as a light yellow oil (24 mg, 34% yield).  $^1\text{H}$  NMR ( $\text{CDCl}_3$ , 360 MHz)  $\delta$  8.08 (t,  $J$  = 8.6 Hz, 6H), 7.79 (d,  $J$  = 8.1 Hz, 3H), 7.70-7.66 (m, 6H), 7.50 (t,  $J$  = 6.6, 1.3 Hz, 3H), 7.01 (s, 3H), 6.63 (s, 6H), 4.48 (s, 6H), 3.83 (s, 9H), 2.66 (s, 9H), 2.53 (s, 1H).  $^{13}\text{C}$  NMR ( $\text{CDCl}_3$ , 100 MHz)  $\delta$  160.7, 150.8, 147.5, 140.6, 137.6, 136.1, 129.2, 128.9, 127.5, 127.3, 125.9, 122.5, 120.7, 120.2, 110.0, 90.2, 72.8, 61.8, 55.4, 54.1, 39.8. IR (neat) 3291, 2925, 2853, 1598, 1503, 1242, 1148, 1027, 829, 744  $\text{cm}^{-1}$ ; HMRS calcd. for  $\text{C}_{57}\text{H}_{53}\text{N}_6\text{O}_3$  ( $\text{MH}^+$ ): 869.4179, found: 869.4193.

### Fluorescence Studies

Fluorescence spectra were recorded on a Shimadzu RF-5301 PC spectrofluorimeter at ambient temperature. Excitation was 235 nm in all cases with the excitation slit width at 5 nm and the emission slit width at 20 nm. All solutions were prepared in acetonitrile with the indicated concentration of  $\text{Me}_4\text{NClO}_4$  as an ionic strength buffer. Solutions were mixed immediately prior to obtaining each spectrum due to the observation of a small amount of photobleaching.

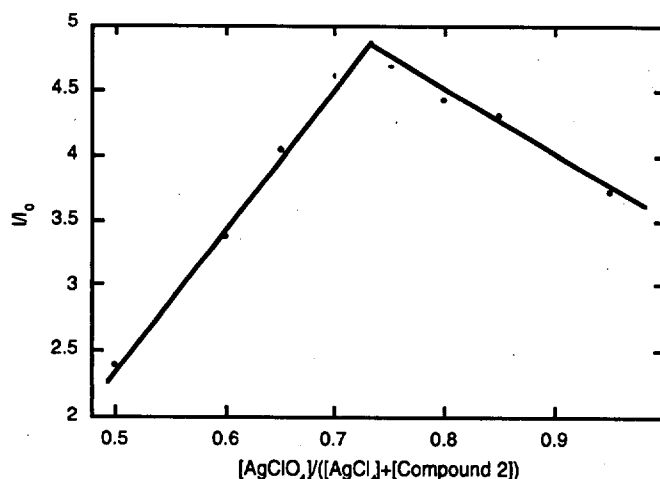

Stoichiometry was determined by a Job analysis.<sup>6</sup> The concentration of Ag(I) and compound **2** was maintained at 10  $\mu\text{M}$  in acetonitrile with 50 mM  $\text{Me}_4\text{NClO}_4$  as an ionic strength buffer. The curve reaches a maximum at 73% Ag(I) which is consistent with 3:1 binding.

- ten Hoeve, W.; Druse, C. G.; Luteyn, J. M.; Thiecke, J.; Wynberg, H. *J. Org. Chem.* **1993**, *58*, 5101.
- Shi, M.; Okamoto, Y.; Takamuku, S. *J. Chem. Soc., Perkin Trans. 1* **1991**, 2391-3.
- (a) Acosta, K.; Cessac, J. W.; Rao, P. N.; Kim, H. K. *J. Chem. Soc., Chem. Commun.*, **1994**, 1985. (b) Olofson, R. A.; Schnur, R. C.; Bunes, L.; Pepe, J. P. *Tetrahedron Lett.* **1977**, *18*, 1567.
- Rieger, B.; Abu-Surrah, A. S.; Fawzi, R.; Steiman, M. *J. Organomet. Chem.* **1995**, *497*, 73.
- Still, W. C.; Kahn, M.; Mitra, A. *J. Org. Chem.* **1978**, *43*, 2923.
- Connors, K. A. *Binding Constants*; John Wiley; New York, 1987.

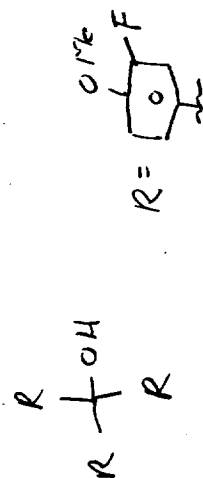

4

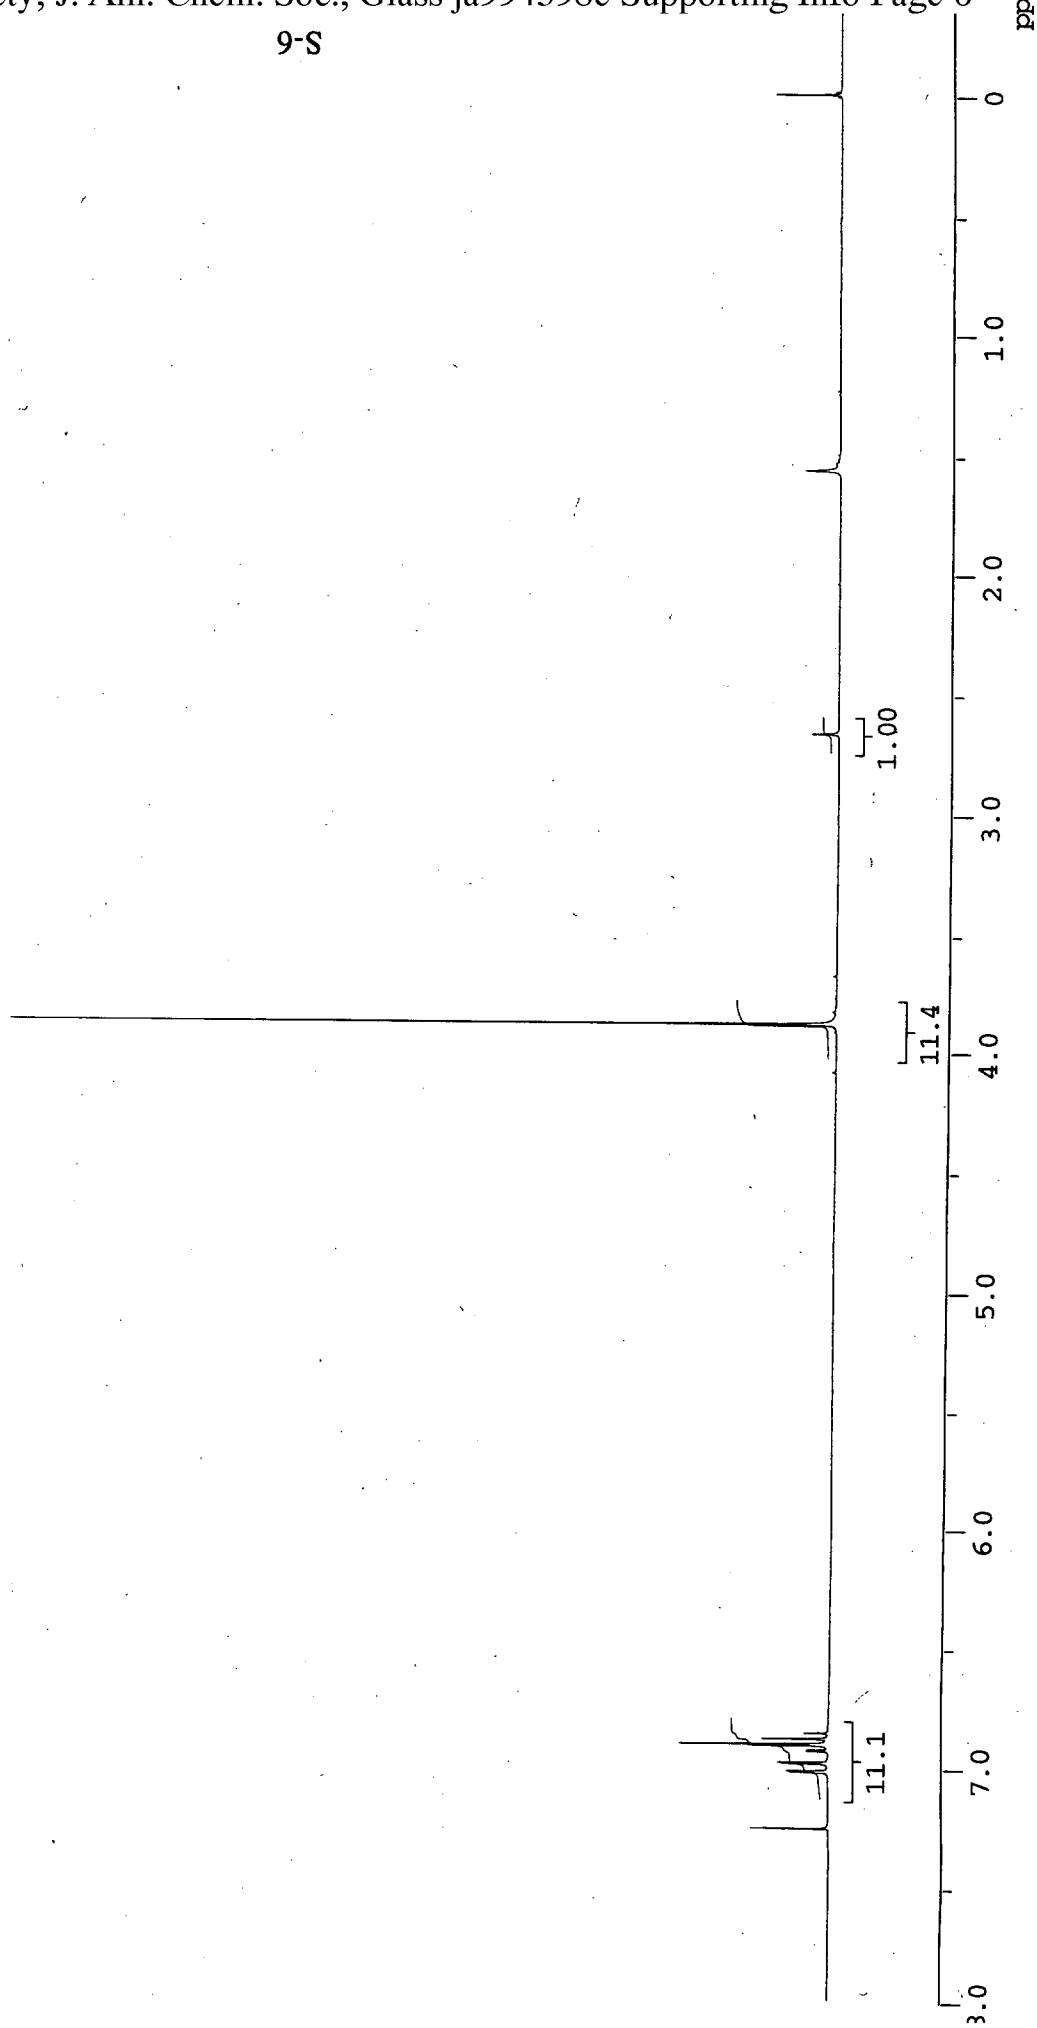

L-S

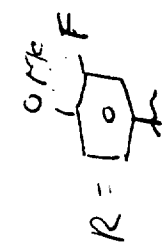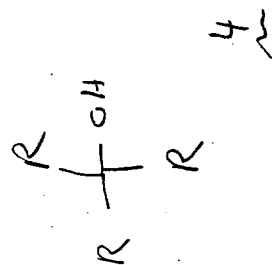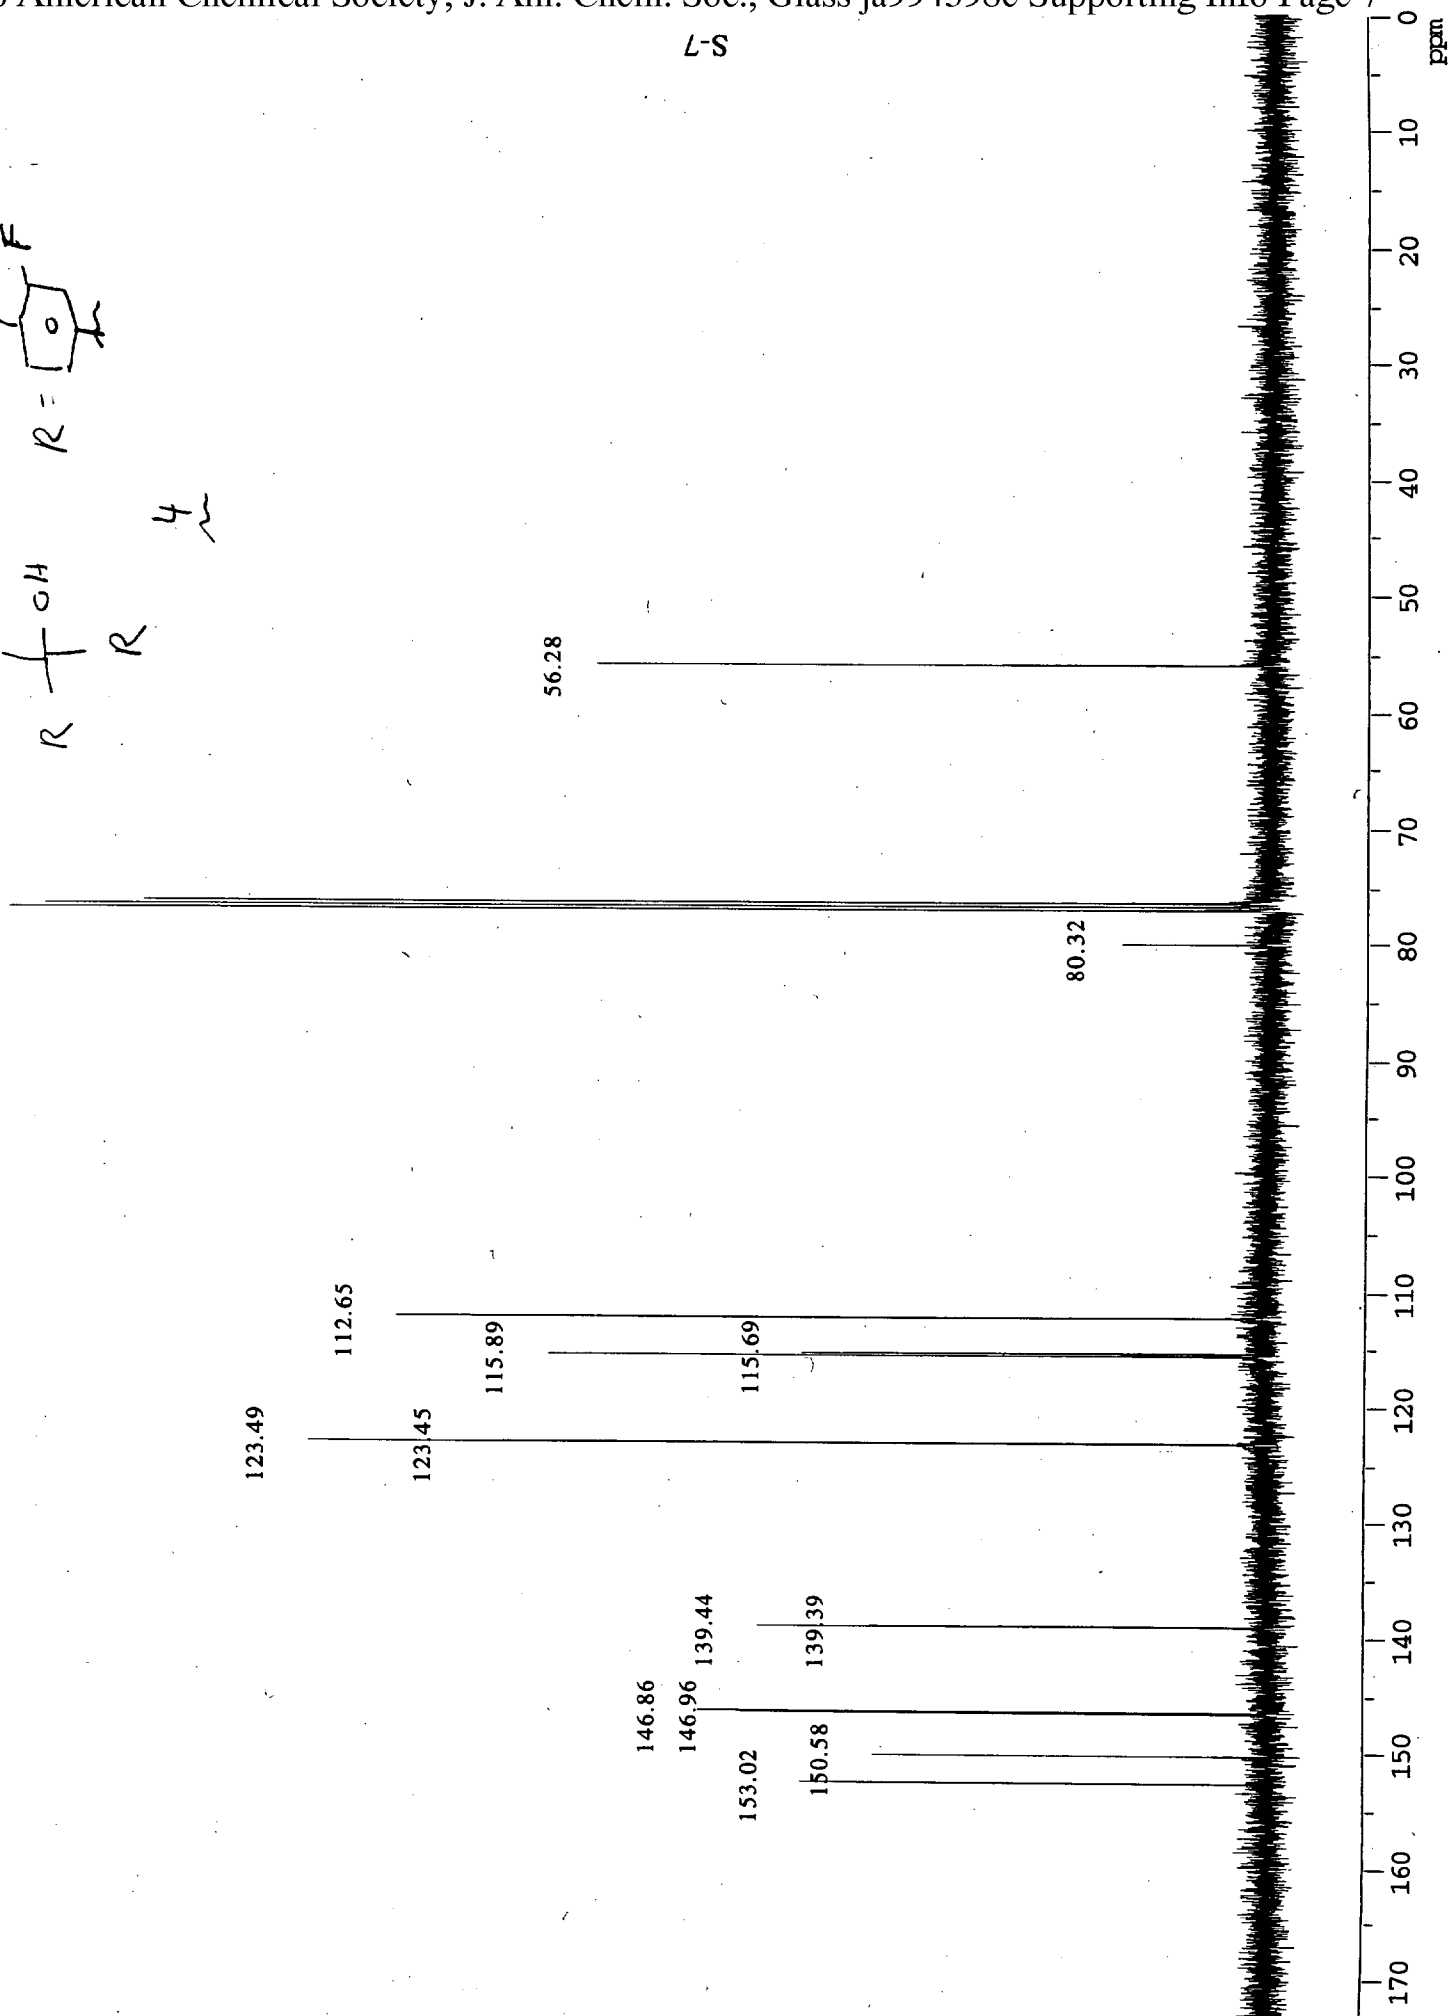

8-S

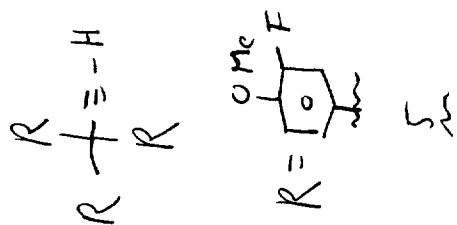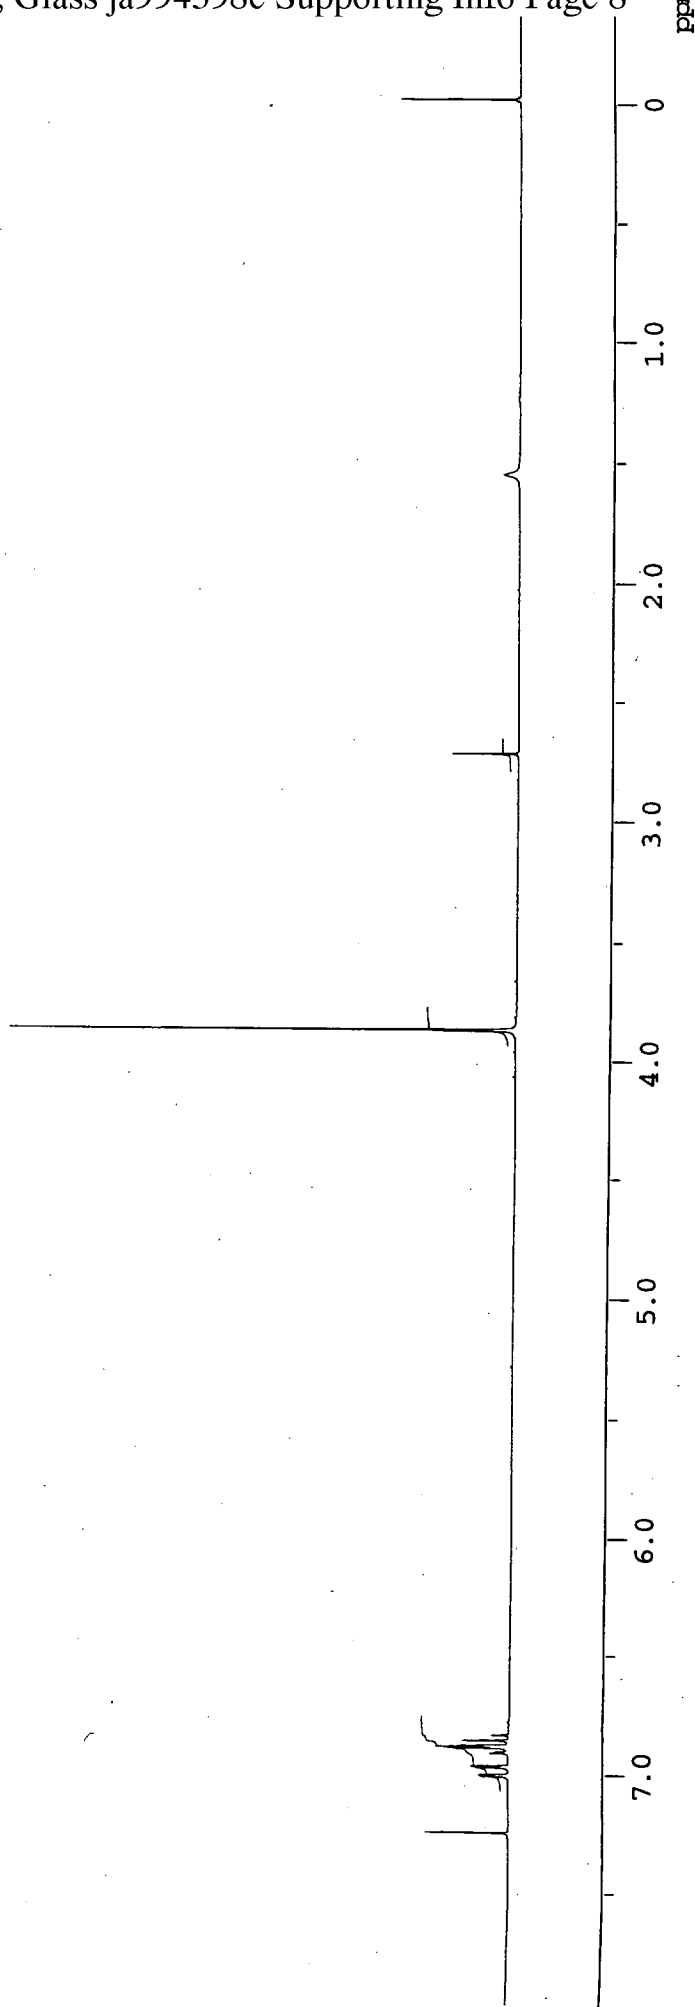



6-S

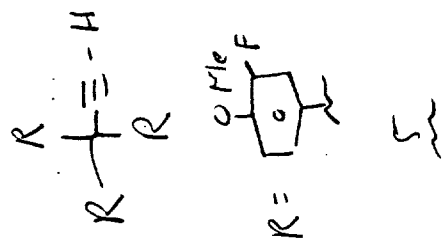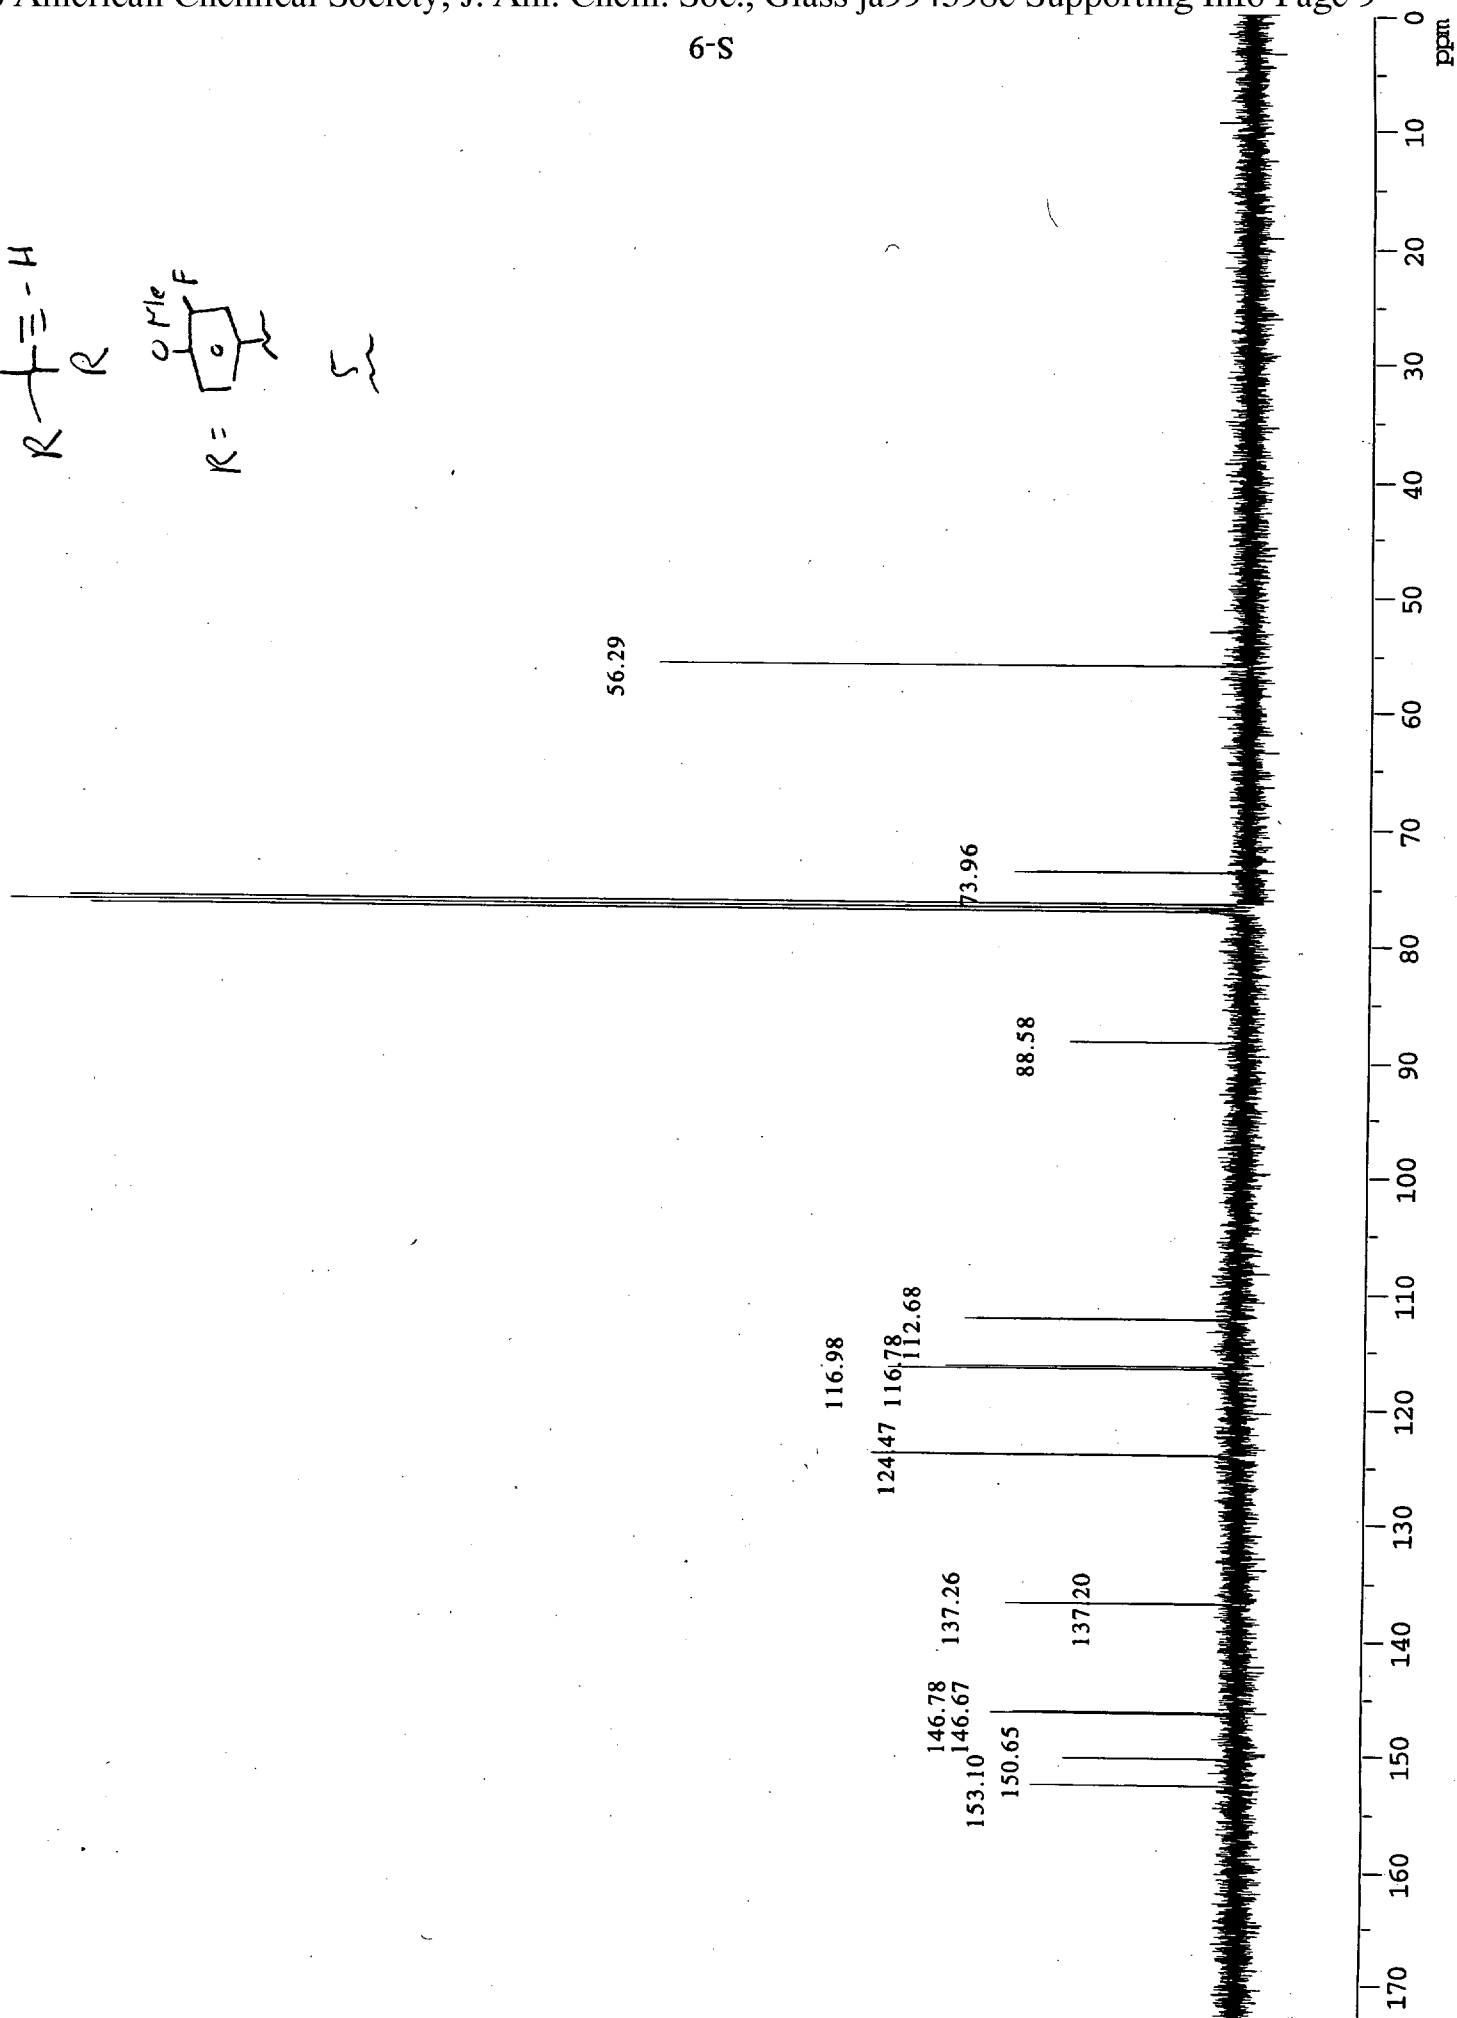

01-S

Current Data Parameters  
 NAME Aug12-99-Glass  
 EXPNO 43  
 PROCNO 1

F2 - Acquisition Parameters  
 Date\_ 990812  
 Time 14.08  
 INSTRUM spect  
 PROBHD 5 mm QNP 1H  
 PULPROG zg30  
 TO 32768  
 SOLVENT CDCl3  
 NS 16  
 DS 2  
 SWH 7462.687 Hz  
 FIDRES 0.227743 Hz  
 AQ 2.1955061 sec  
 RG 4096  
 DW 67.000 usec  
 DE 95.71 usec  
 TE 300.0 K  
 HL1 0 dB  
 D1 1.00000000 sec  
 P1 12.60 usec  
 SF01 360.1361940 MHz  
 NUCLEUS 1H

F2 - Processing parameters  
 SI 16384  
 SF 360.1339828 MHz  
 WDW EM  
 SSB 0  
 LB 0.30 Hz  
 GB 0  
 PC 1.00

1D NMR plot parameters  
 CX 20.00 cm  
 F1P 11.000 ppm  
 F1 3961.47 Hz  
 F2P -1.000 ppm  
 F2 -360.13 Hz  
 PPMCM 0.60000 ppm/cm  
 HZCM 216.08038 Hz/cm

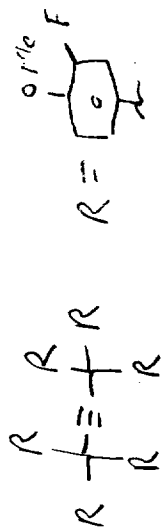

white cap

65

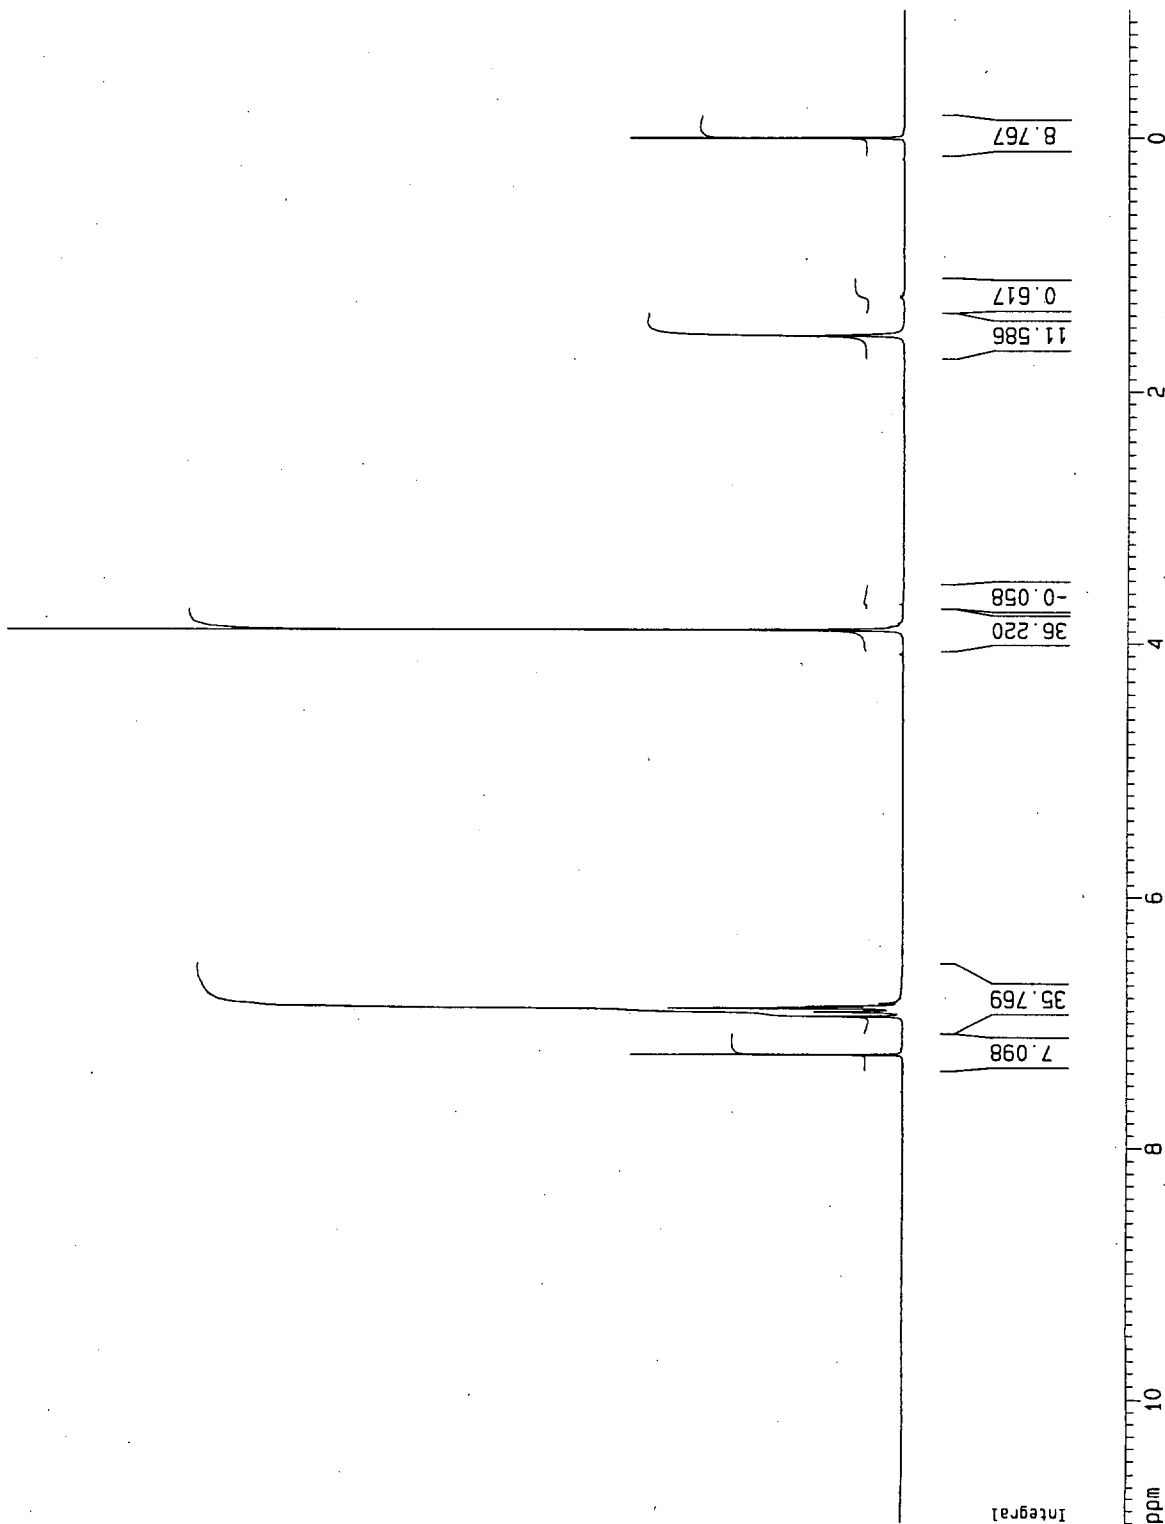

II-S

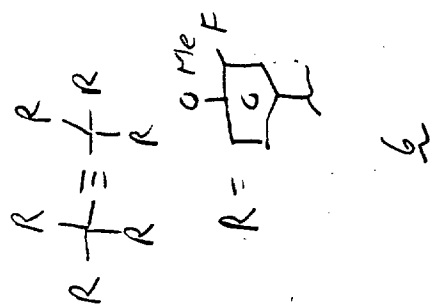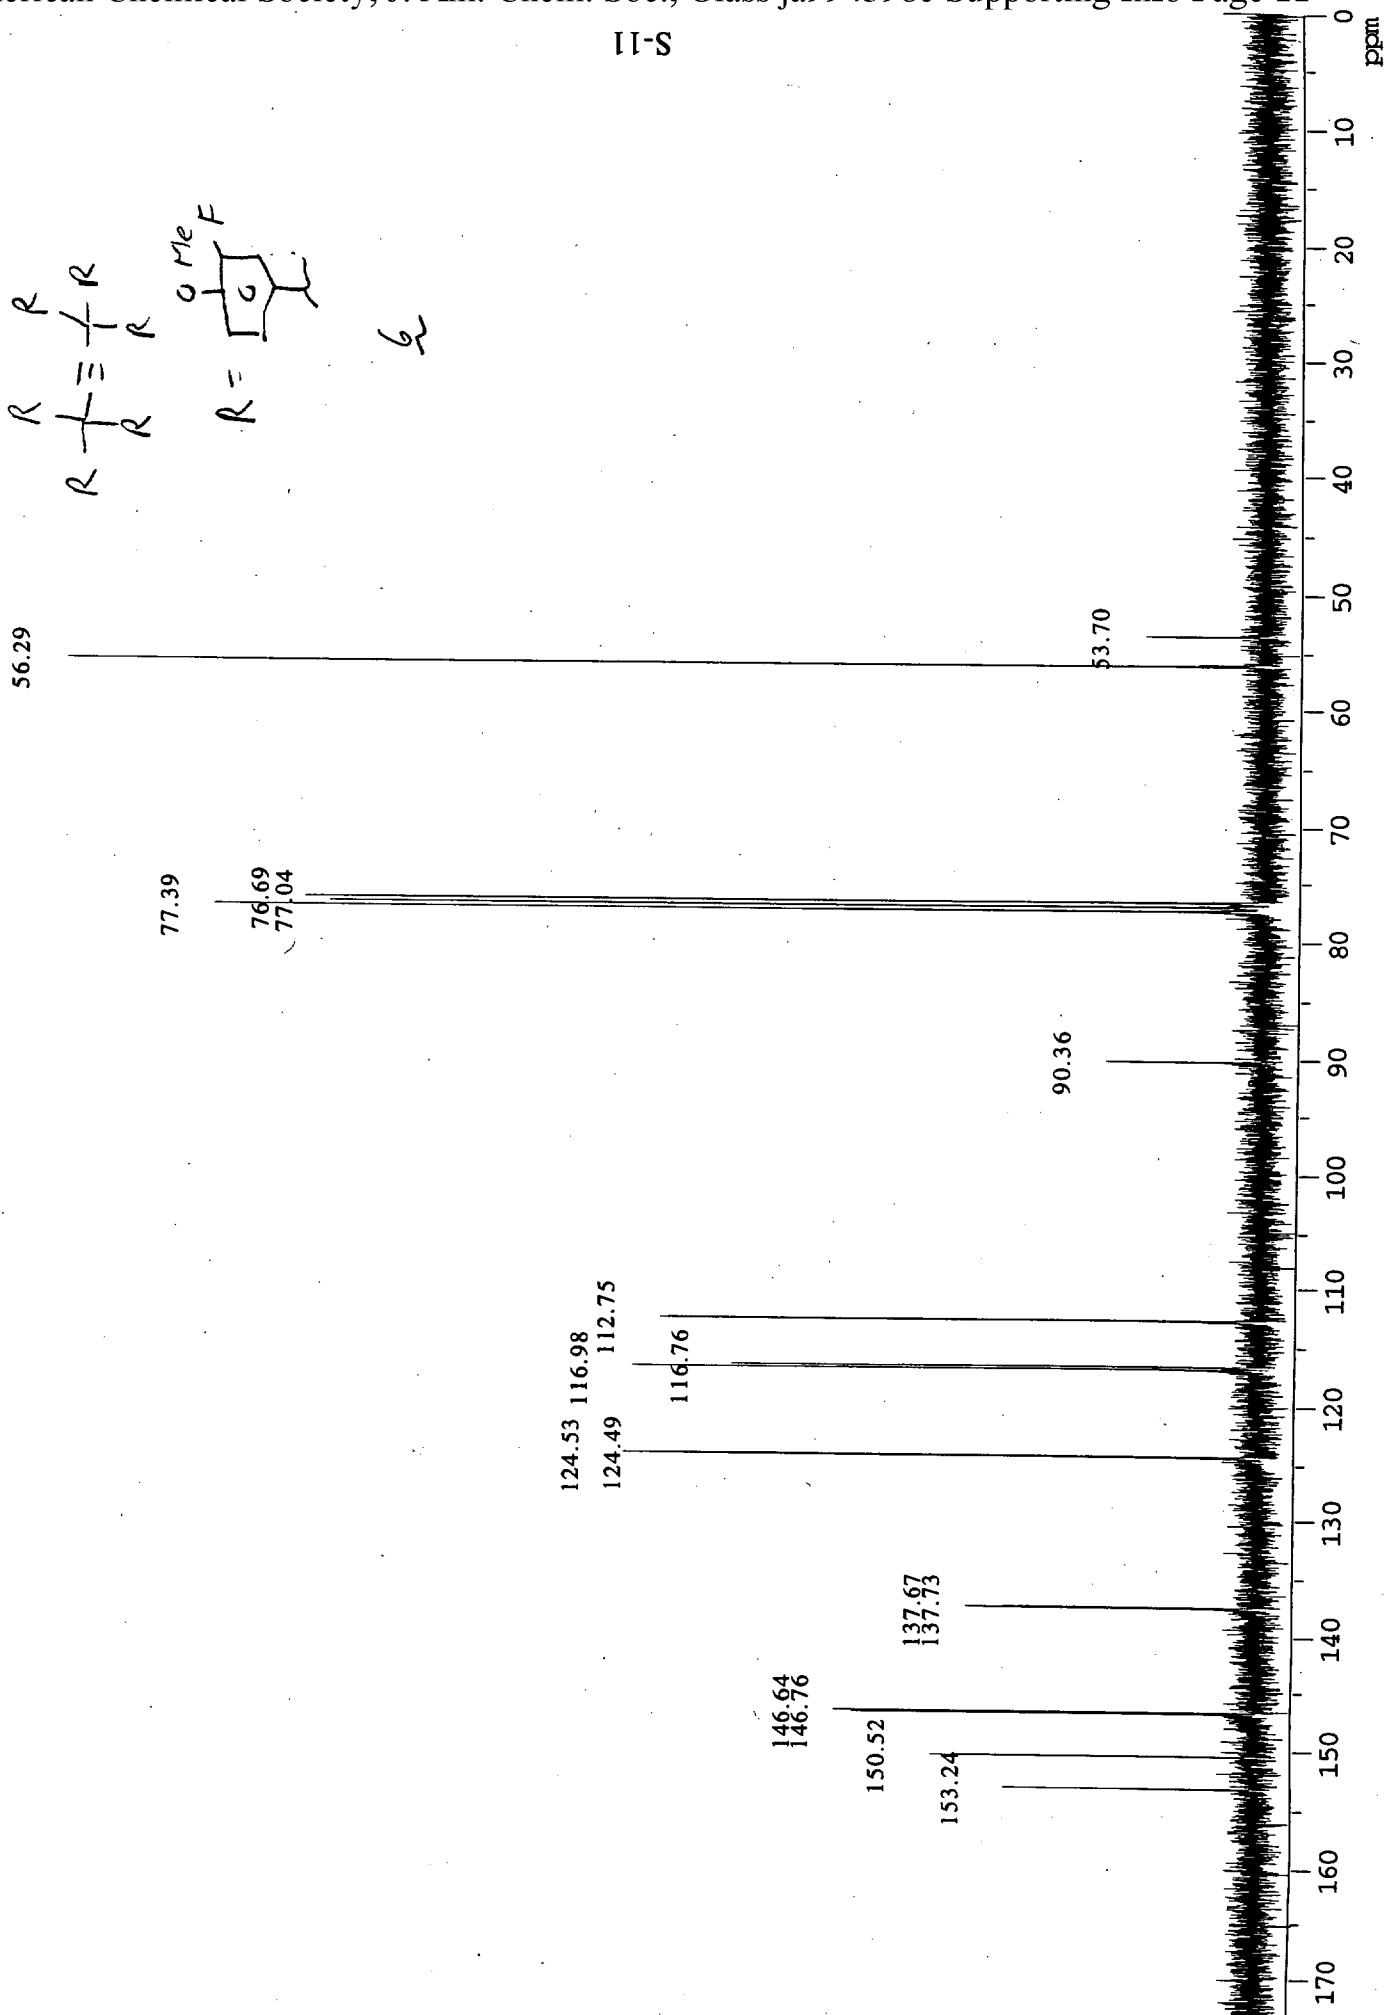

S-12

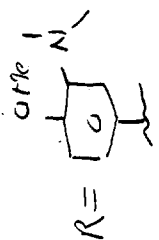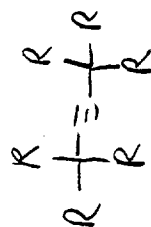

400 MHz  
TEC-I-2000

\*\*\* fid.swan \*\*\*

| no. | PEAKS<br>ppm | Hz      | intensity |
|-----|--------------|---------|-----------|
| 1   | 6.969        | 2788.35 | 2353.00   |
| 2   | 6.964        | 2786.34 | 2196.63   |
| 3   | 6.765        | 2707.03 | 966.90    |
| 4   | 6.759        | 2704.52 | 849.84    |
| 5   | 6.744        | 2698.50 | 1627.24   |
| 6   | 6.739        | 2696.49 | 1393.83   |
| 7   | 6.688        | 2675.91 | 2647.22   |
| 8   | 6.666        | 2667.38 | 1563.99   |
| 9   | 3.843        | 1537.53 | 11736.45  |
| 10  | 2.540        | 1016.52 | 957.80    |
| 11  | 2.518        | 1007.48 | 21018.38  |
| 12  | 2.58e-4      | 0.10    | 1940.25   |

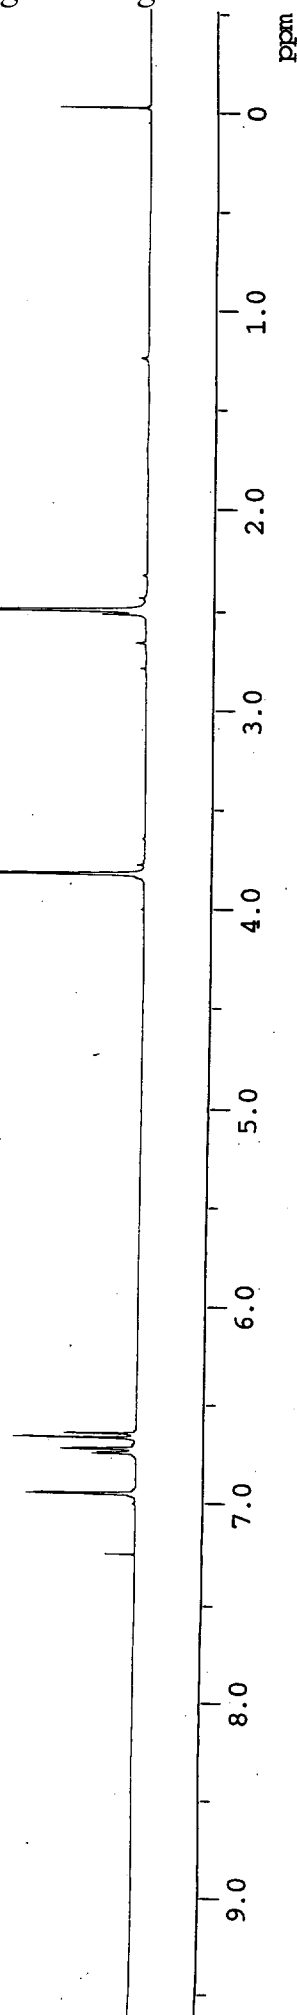

S-13

Current Data Parameters  
 NAME May10-99-Glass  
 EXPNO 11  
 PROCNO 1

F2 - Acquisition Parameters  
 Date\_ 990510  
 Time 17.16  
 INSTRUM Spect  
 PROBD 5 mm BBI 1H-B  
 PULPROG zgpg30  
 TD 65536  
 SOLVENT CDCl3  
 NS 1024  
 DS 2  
 SWH 31847.133 Hz  
 FIDRES 0.485949 Hz  
 AQ 1.0289652 sec  
 RG 4096  
 DM 15.700 usec  
 DE 6.00 usec  
 TE 300.0 K  
 d11 0.03000000 sec  
 d12 0.00002000 sec  
 PL13 24.00 dB  
 D1 2.00000000 sec  
 CPDPRG2 waltz16  
 PCPD2 111.00 usec  
 SF02 400.1316005 MHz  
 NUC2 1H  
 PL2 0.00 dB  
 PL12 24.00 dB  
 P1 16.00 usec  
 SF01 100.6254358 MHz  
 NUC1 13C  
 PL1 -6.00 dB

F2 - Processing parameters  
 SI 32768  
 SF 100.6125149 MHz  
 WDW EM  
 SSB 0  
 LB 1.00 Hz  
 GB 0  
 PC 1.40

1D NMR plot parameters  
 CX 20.00 cm  
 F1P 215.000 ppm  
 F1 21631.69 Hz  
 F2P -5.000 ppm  
 F2 -503.06 Hz  
 PPMCM 11.00000 ppm/cm  
 HZCM 1106.73767 Hz/cm

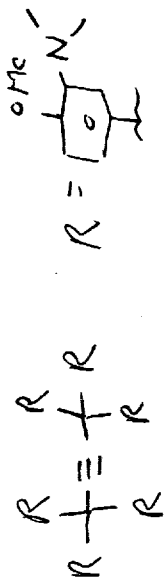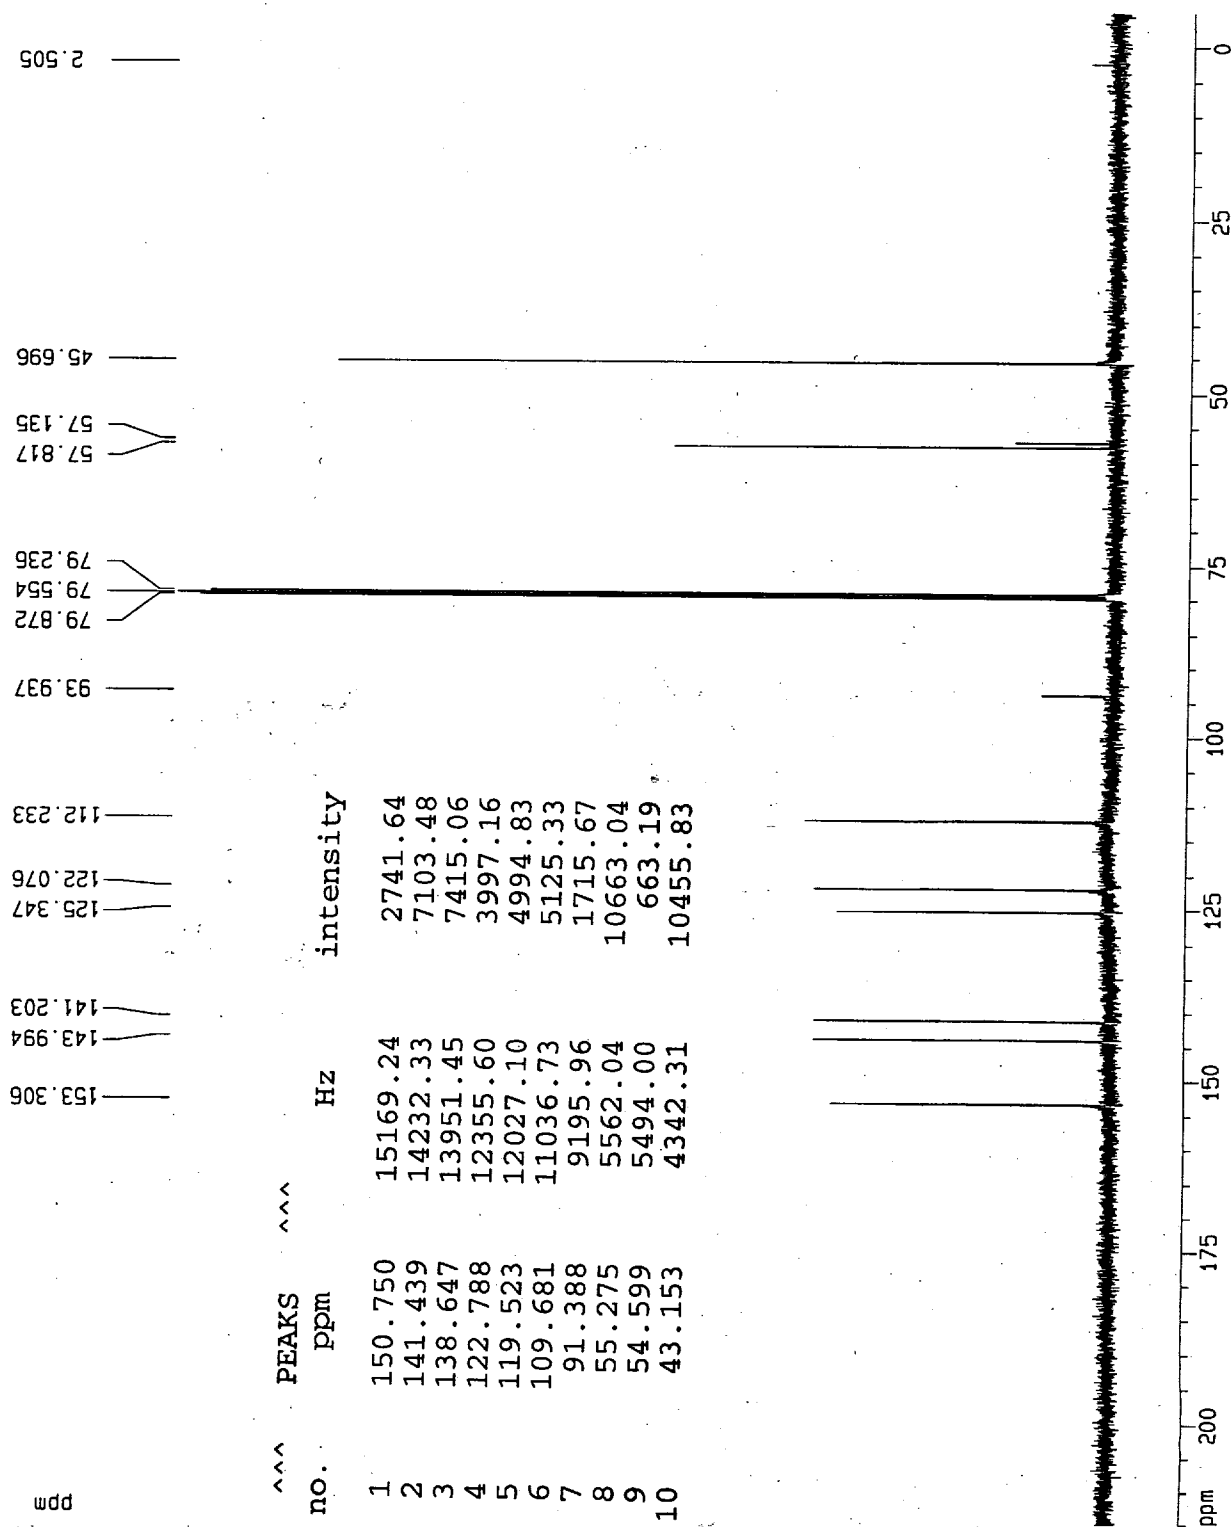

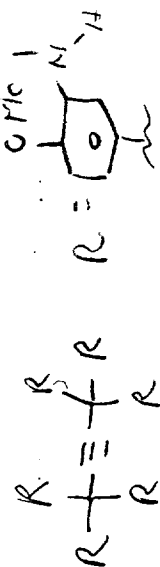

2

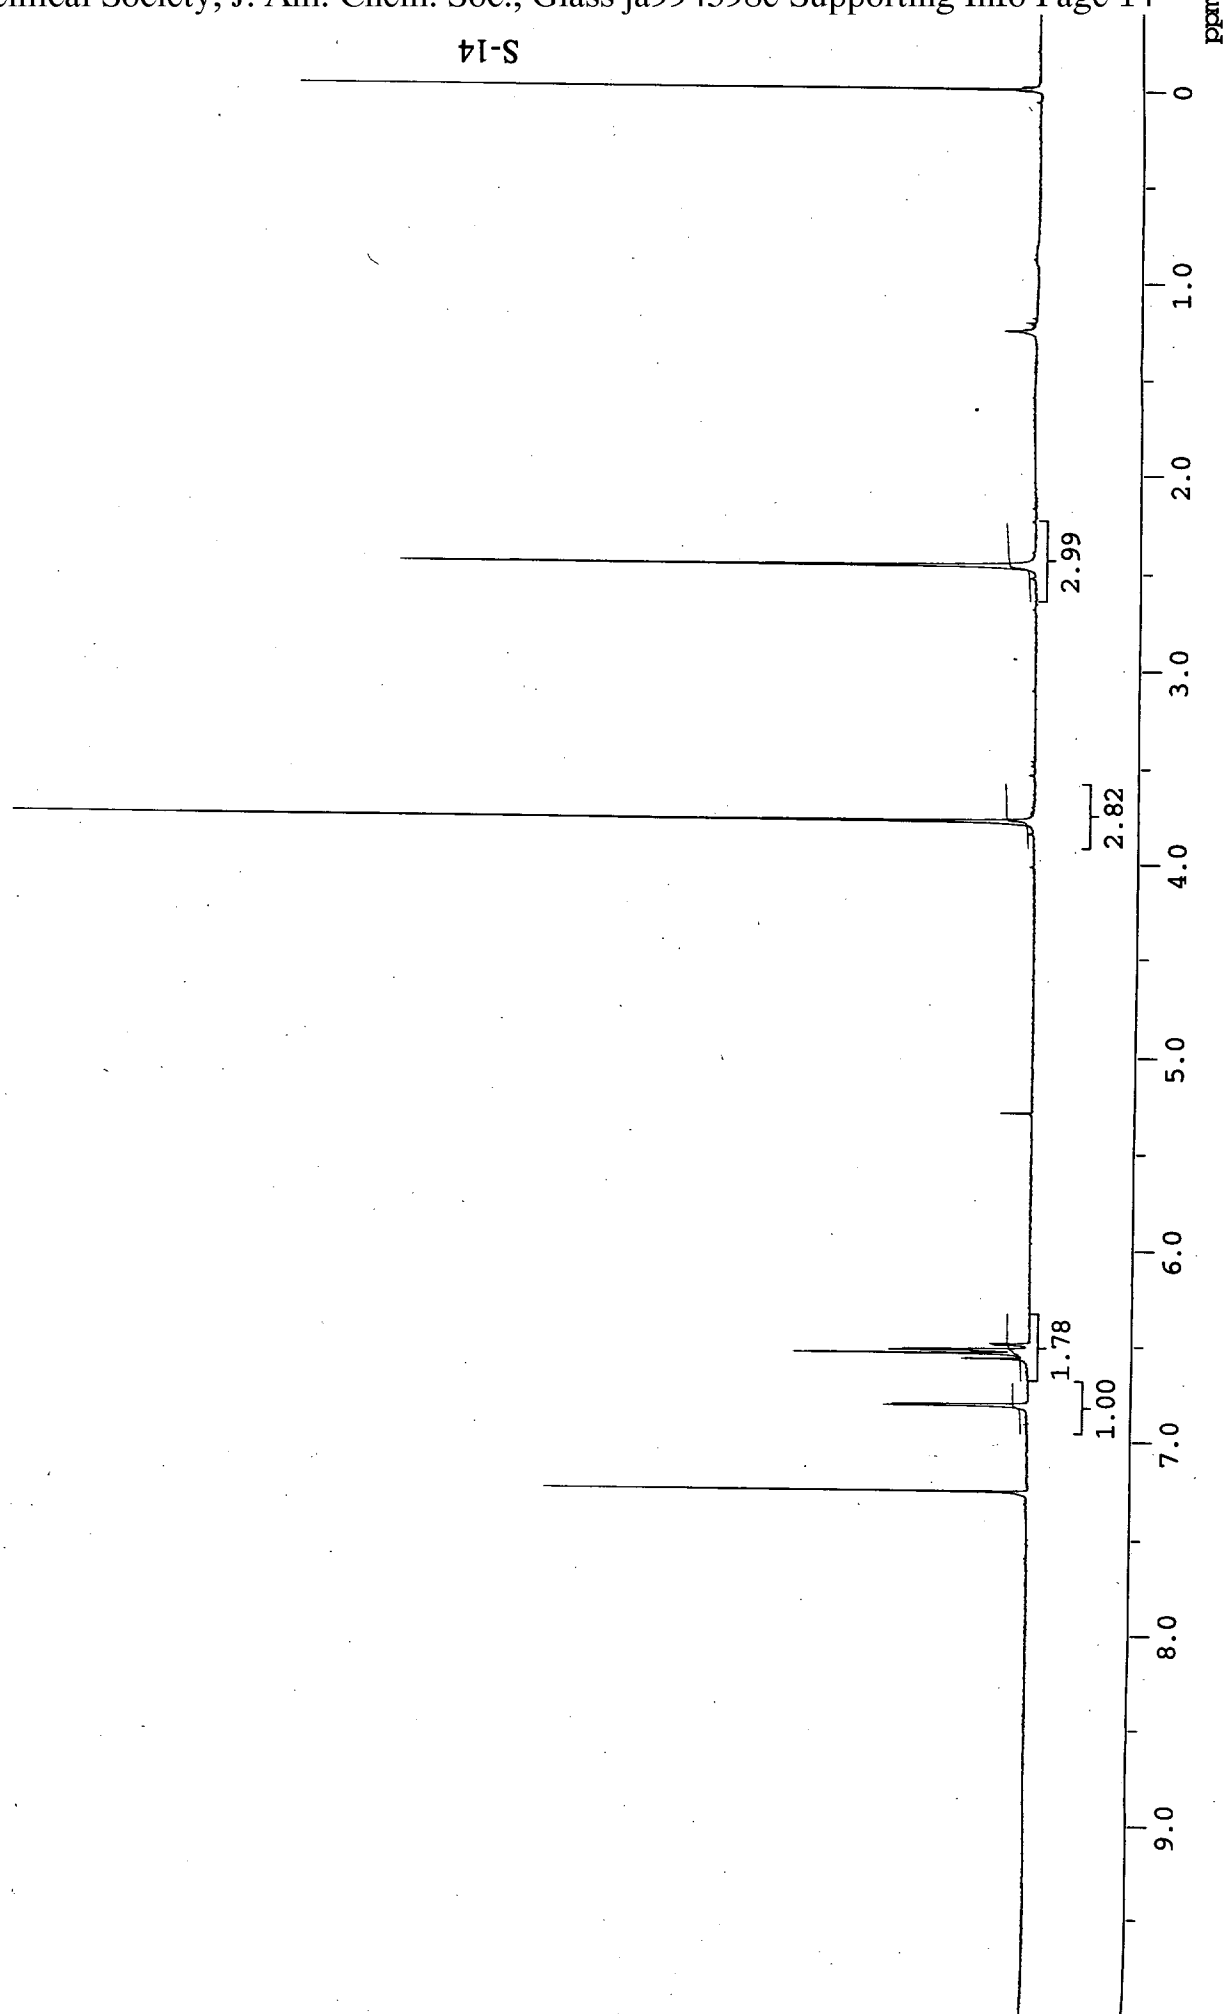

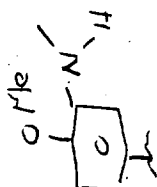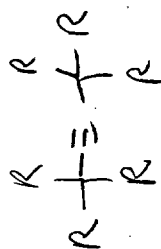

TEG-I-203. SETA

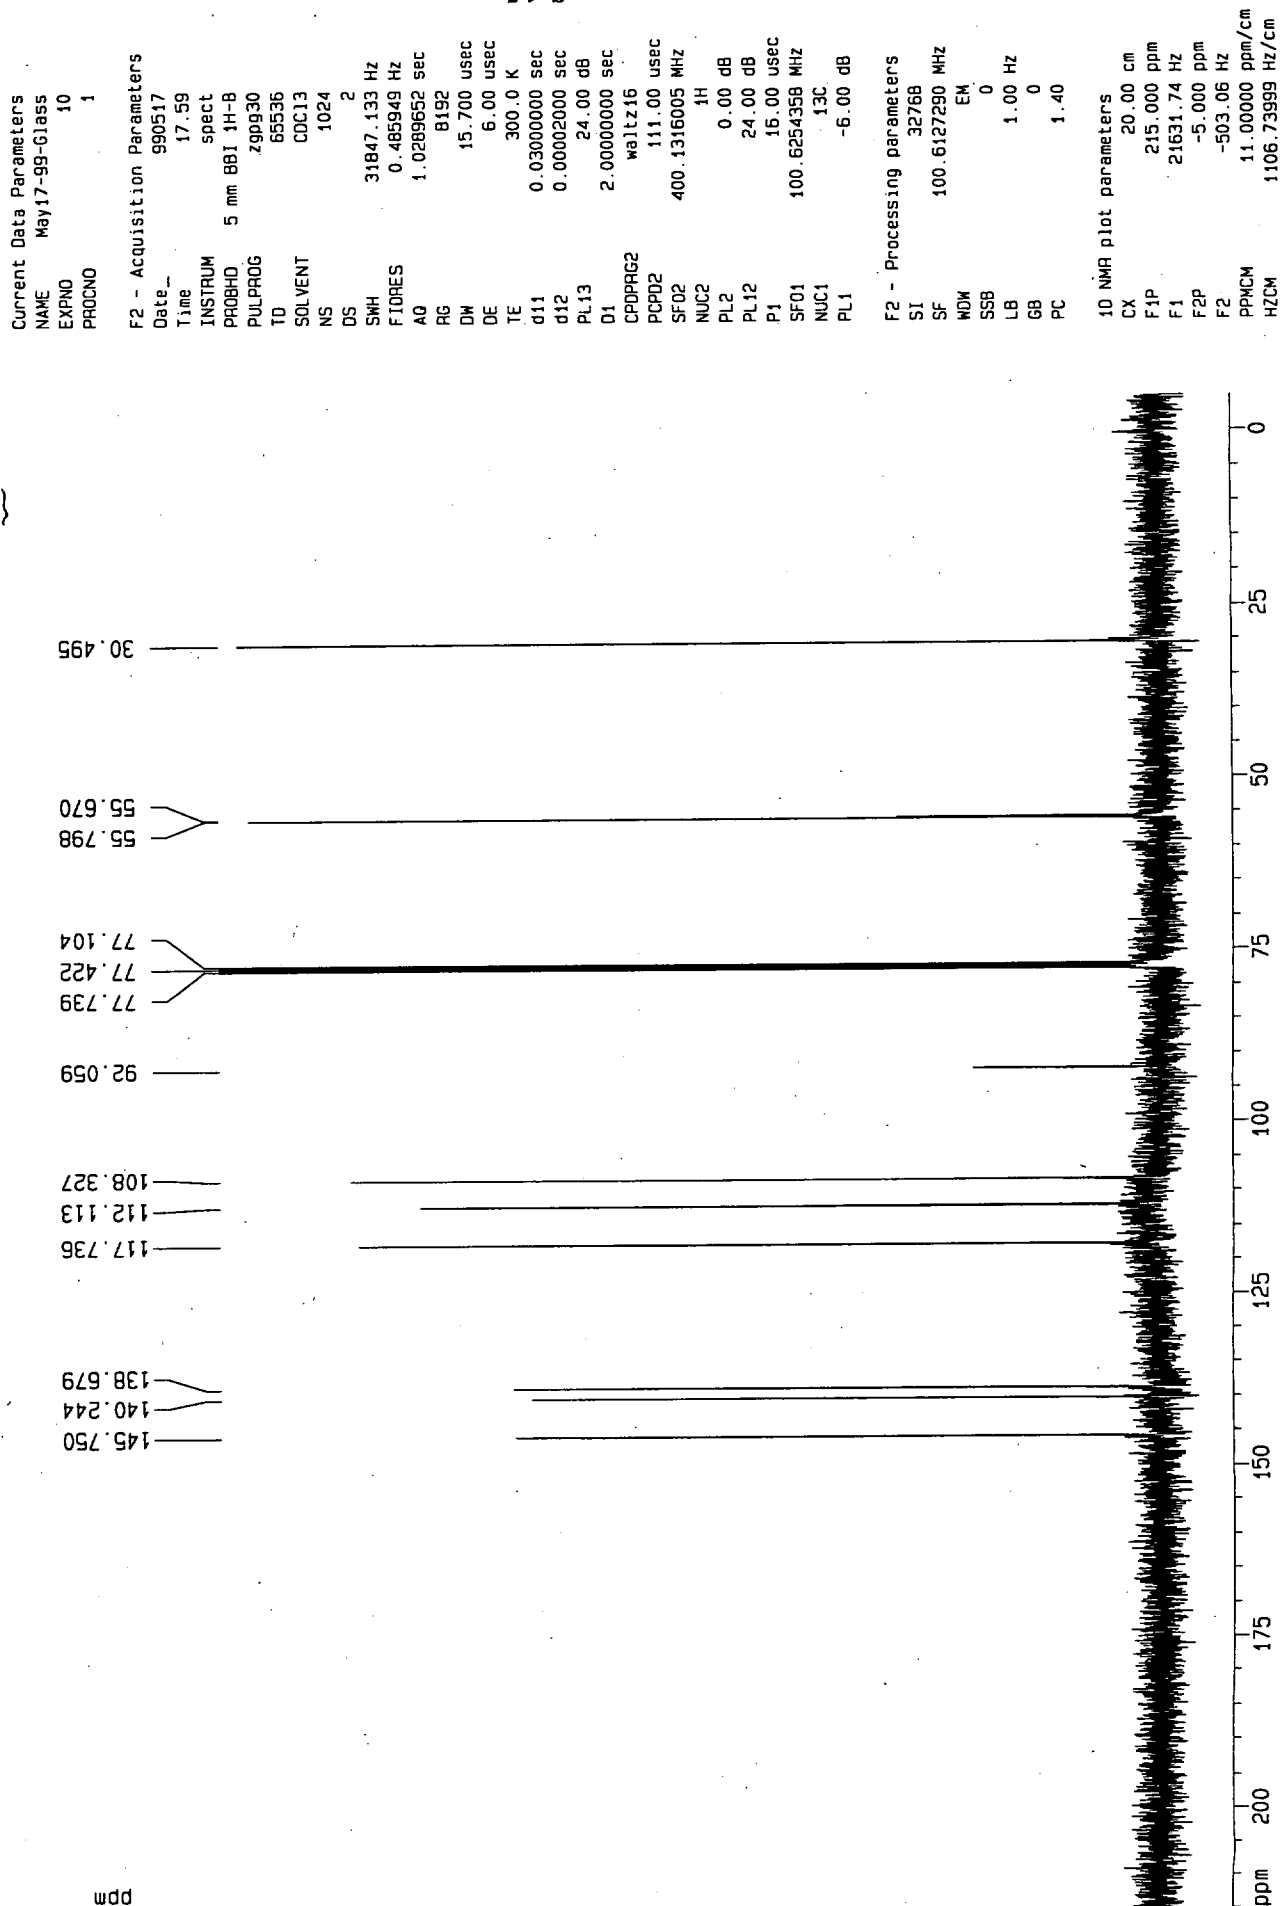

91-S

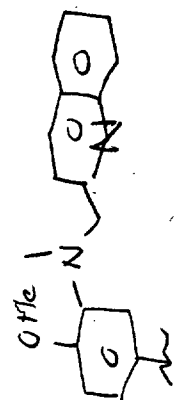

R =

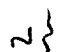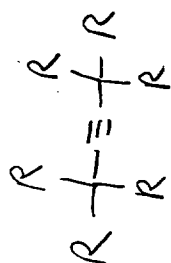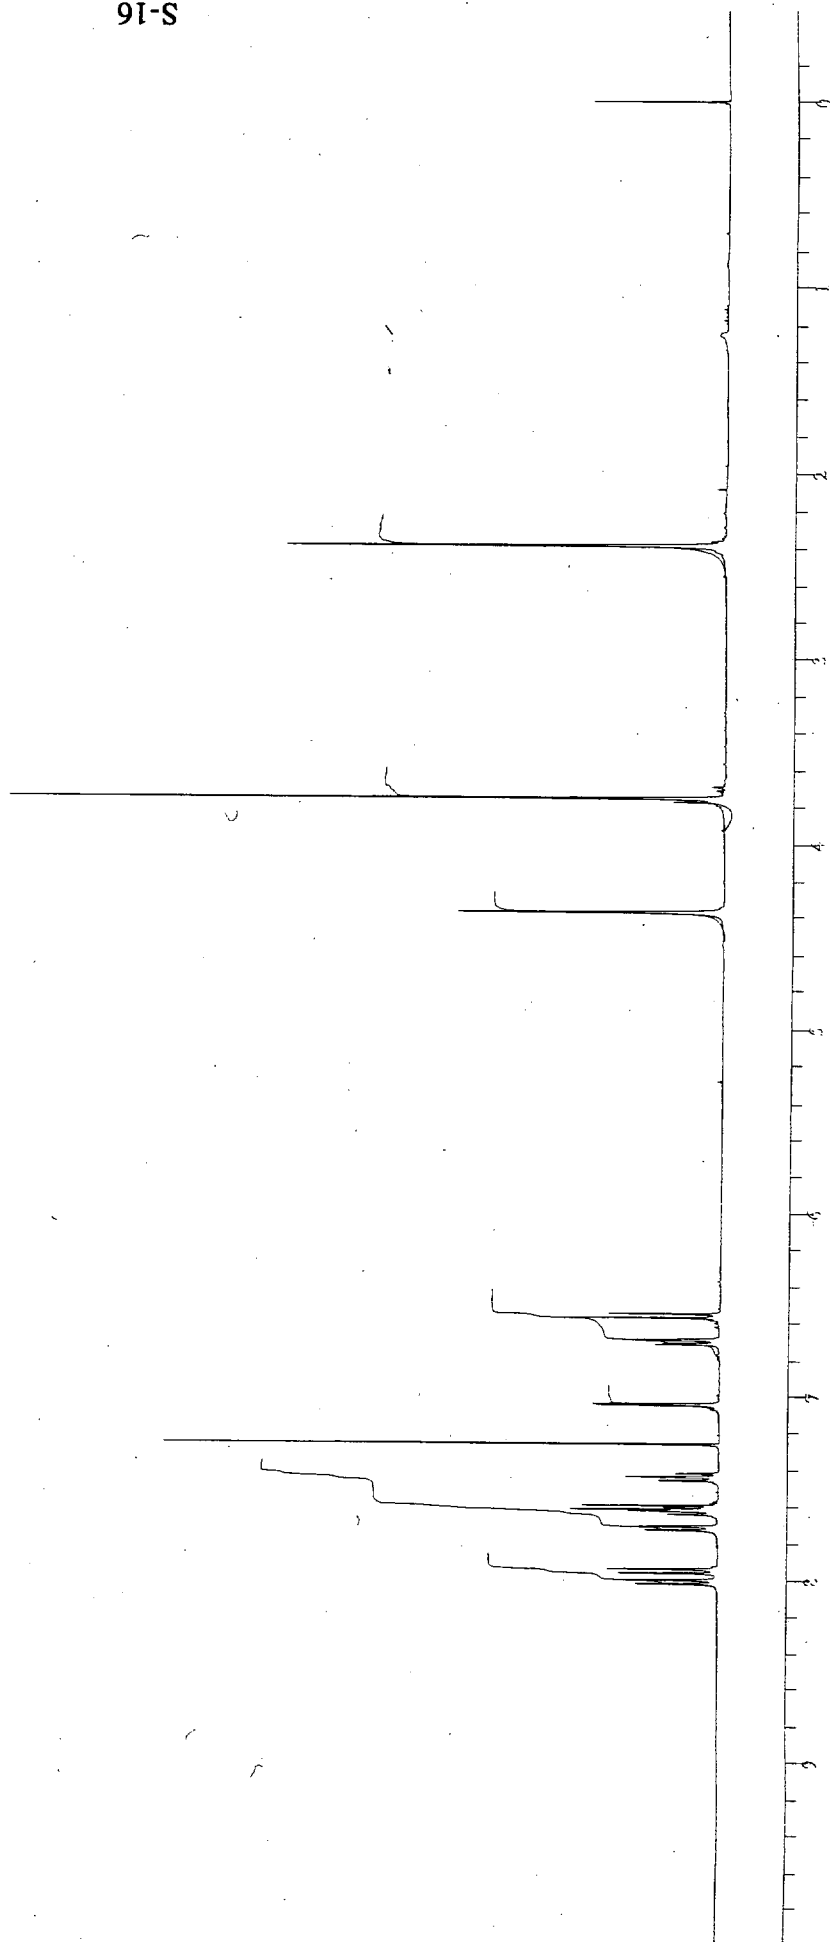



LI-S

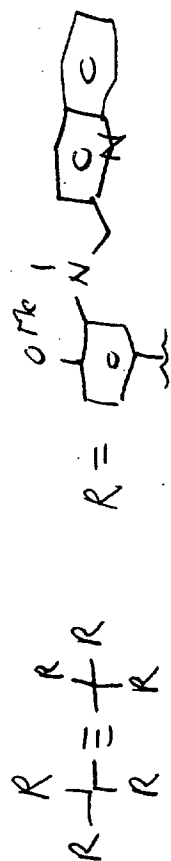

2

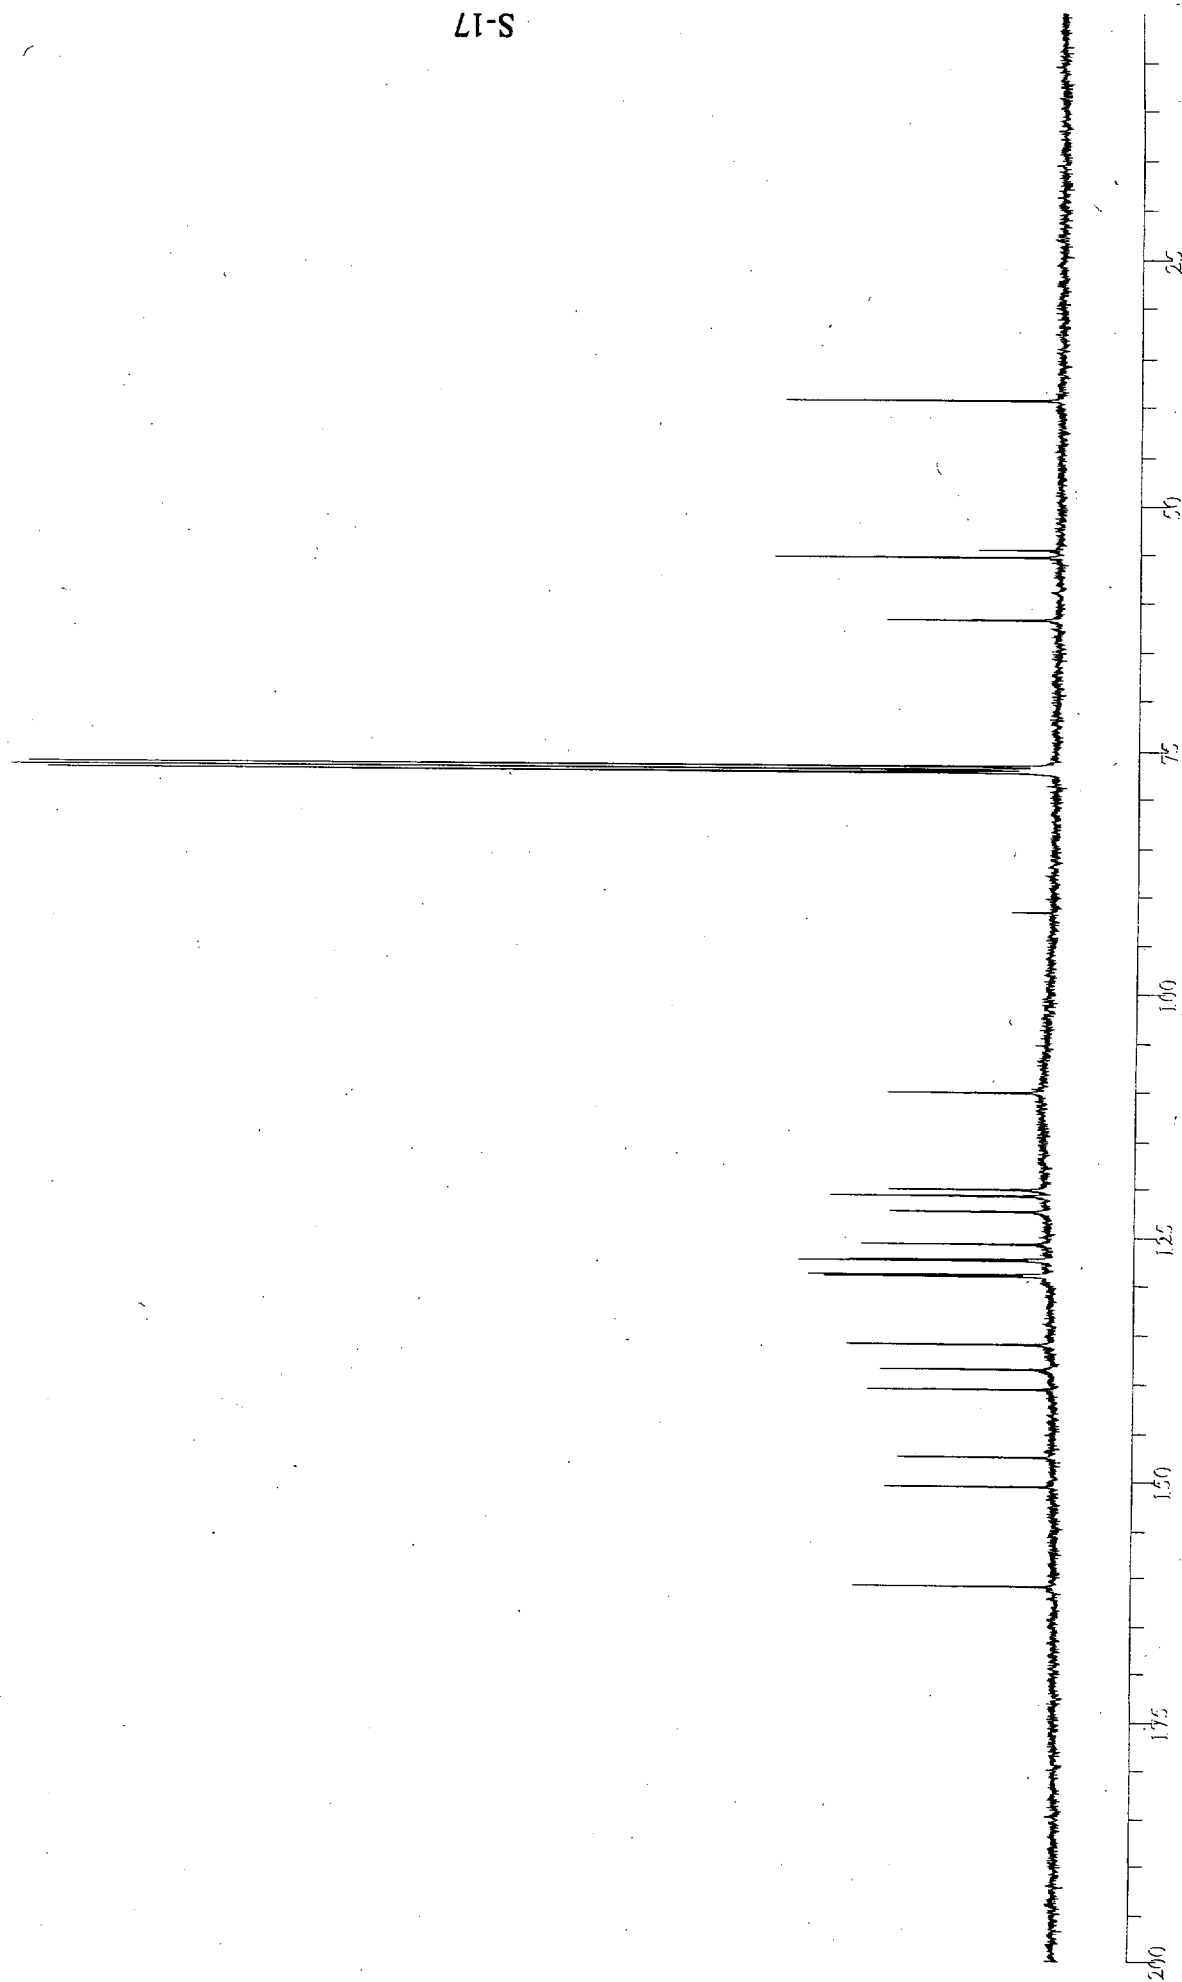

8I-S

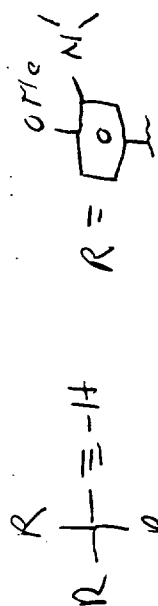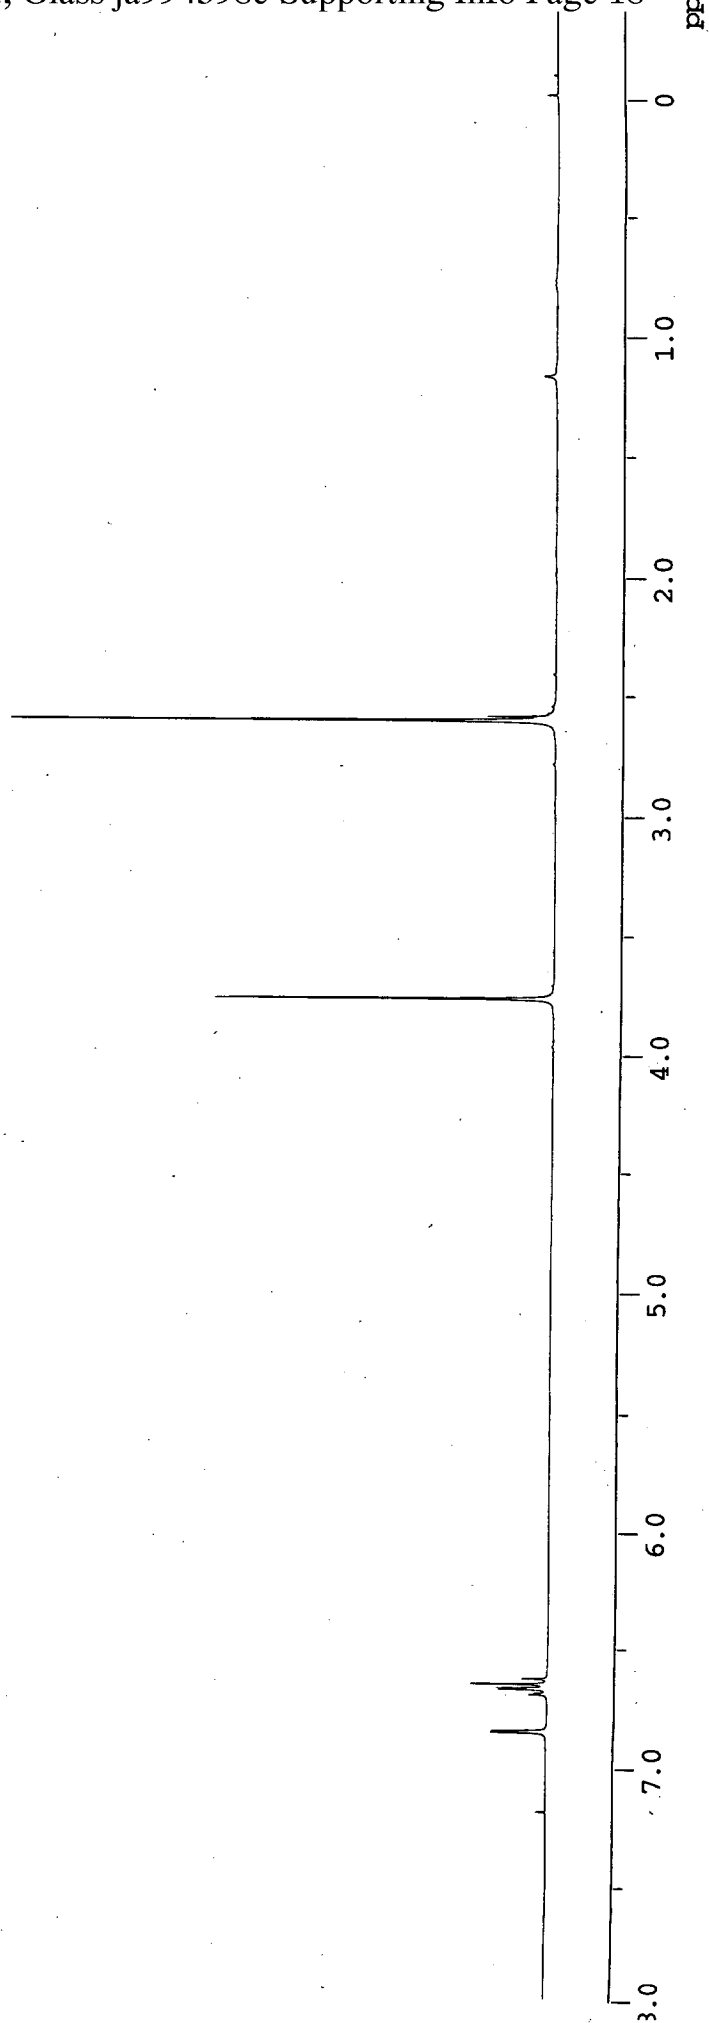

6I-S

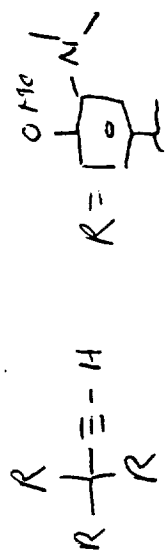

43.23

137.61

141.48

150.98

122.79

119.36

109.79

76.67

77.37

77.02

55.24

72.50

54.13

90.48

ppm

S-20

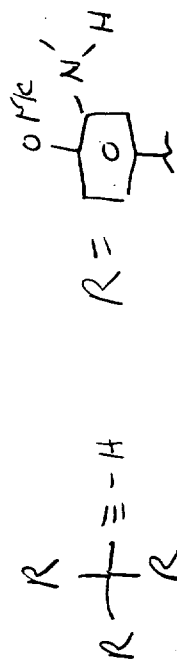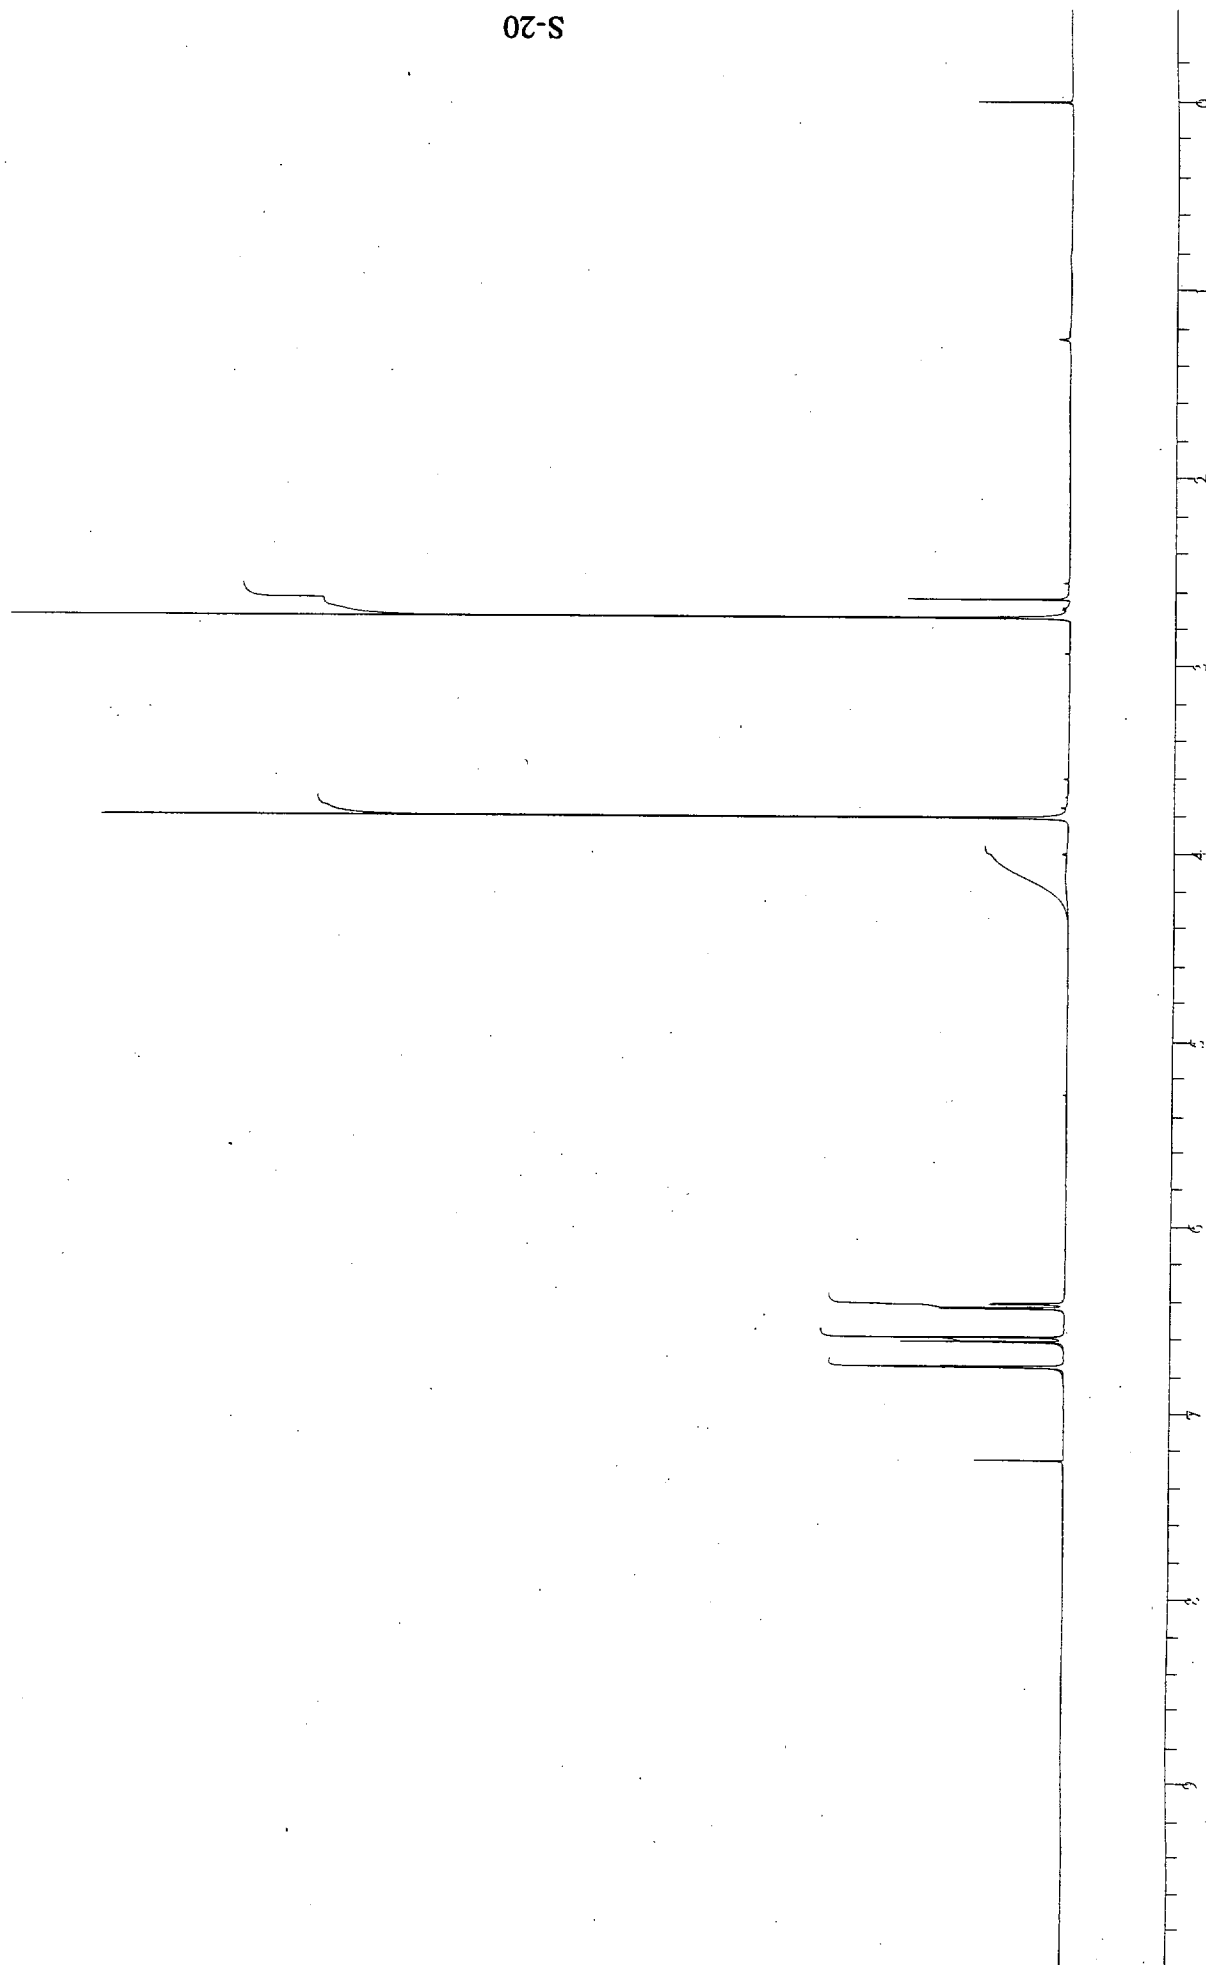

17-S

TEG-I - 226

| ppm     | Hertz     | Height    |
|---------|-----------|-----------|
| 158.044 | 15901.213 | Threshold |
| 17.455  | 1756.219  | 8.303     |
| 145.650 | 14654.248 | 79.087    |
| 138.587 | 13943.658 | 55.170    |
| 138.452 | 13930.034 | 57.366    |
| 117.279 | 11799.796 | 98.756    |
| 111.086 | 11176.706 | 97.030    |
| 107.986 | 10864.733 | 94.727    |
| 91.323  | 9188.297  | 19.238    |
| 77.315  | 7778.911  | 198.229   |
| 76.997  | 7746.914  | 196.185   |
| 76.679  | 7714.910  | 169.790   |
| 72.090  | 7253.201  | 35.101    |
| 55.379  | 5571.871  | 117.766   |
| 54.777  | 5511.238  | 15.721    |
| 30.408  | 3059.412  | 108.733   |

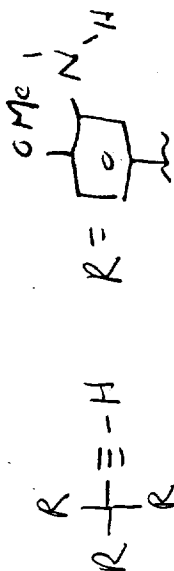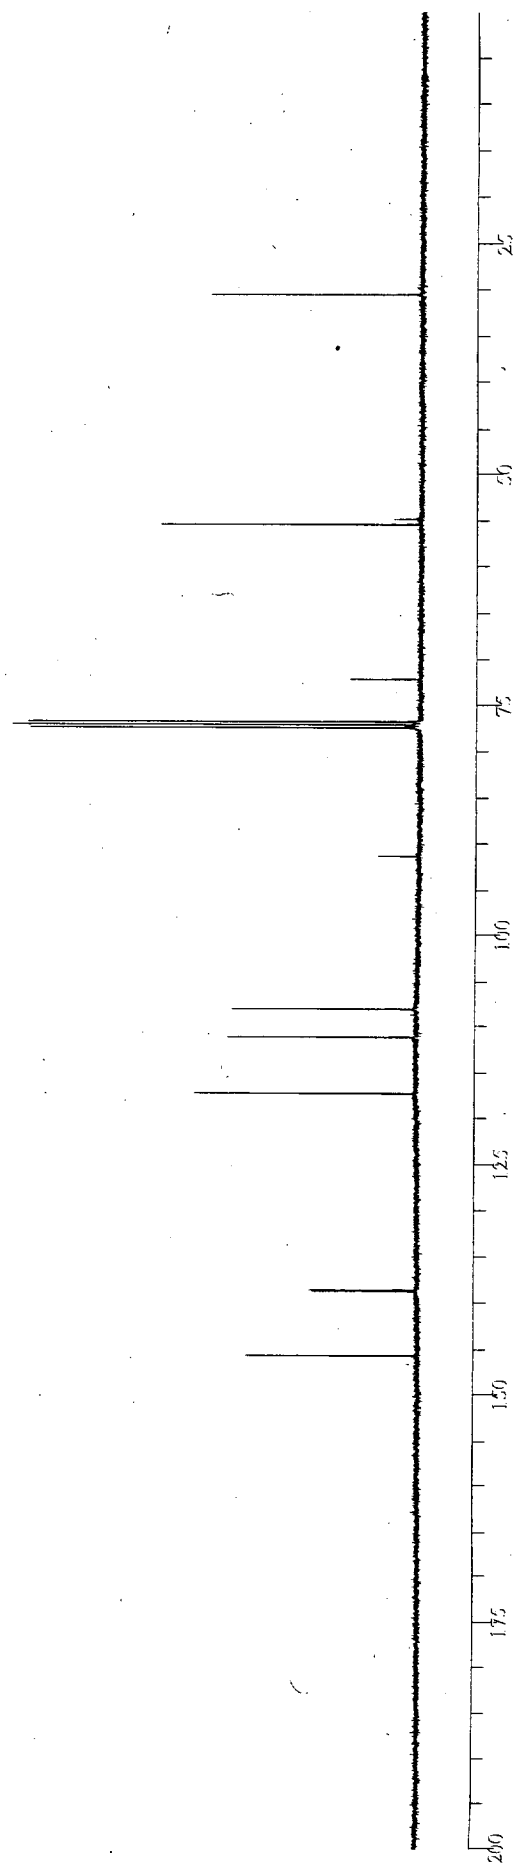

S-22

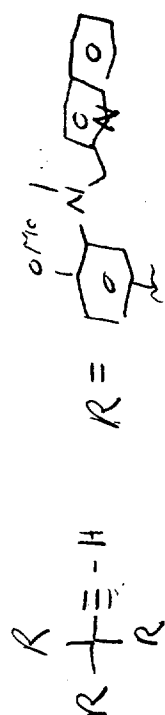

3

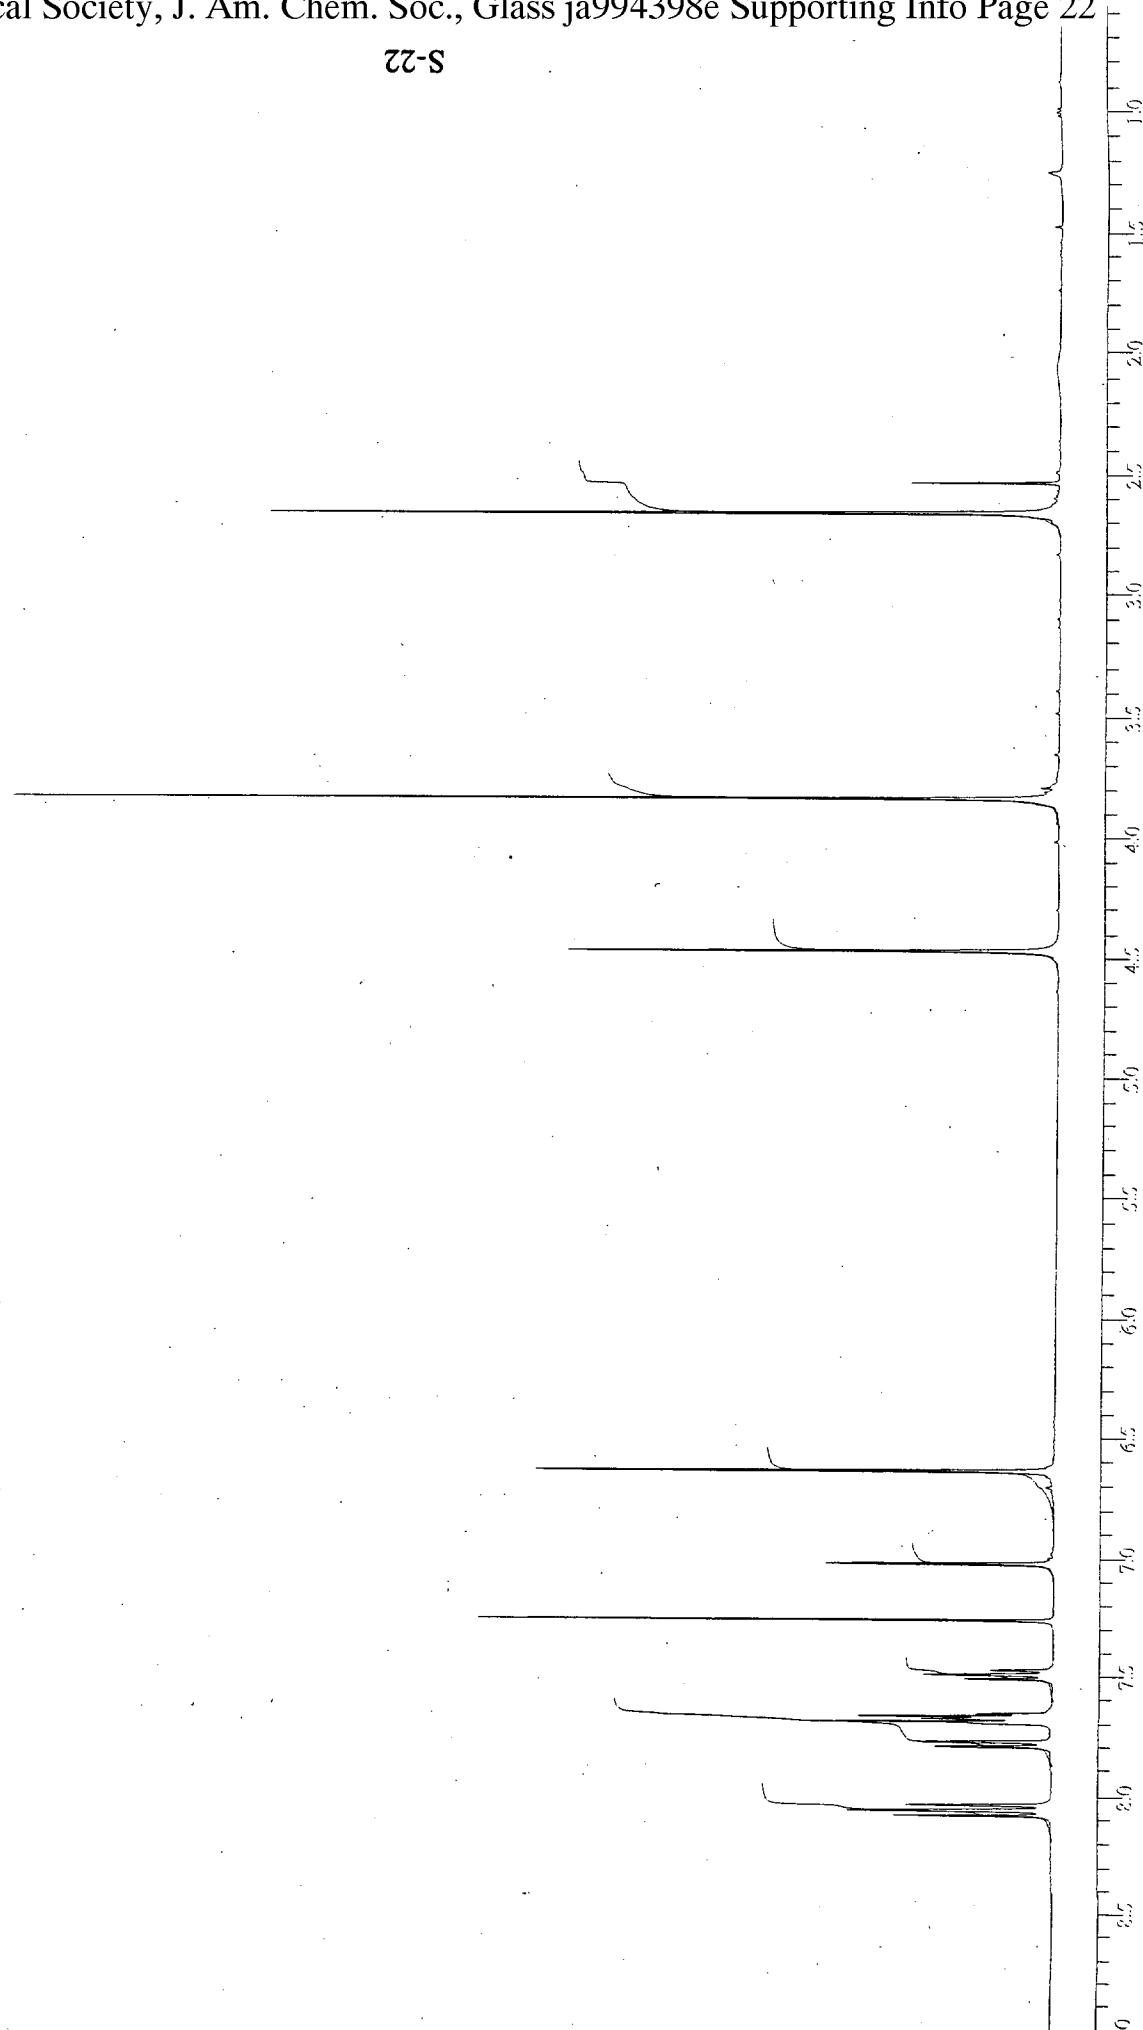

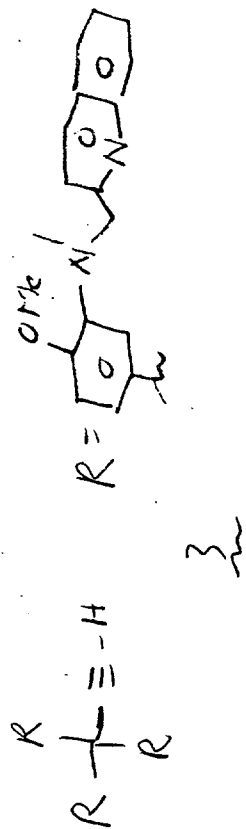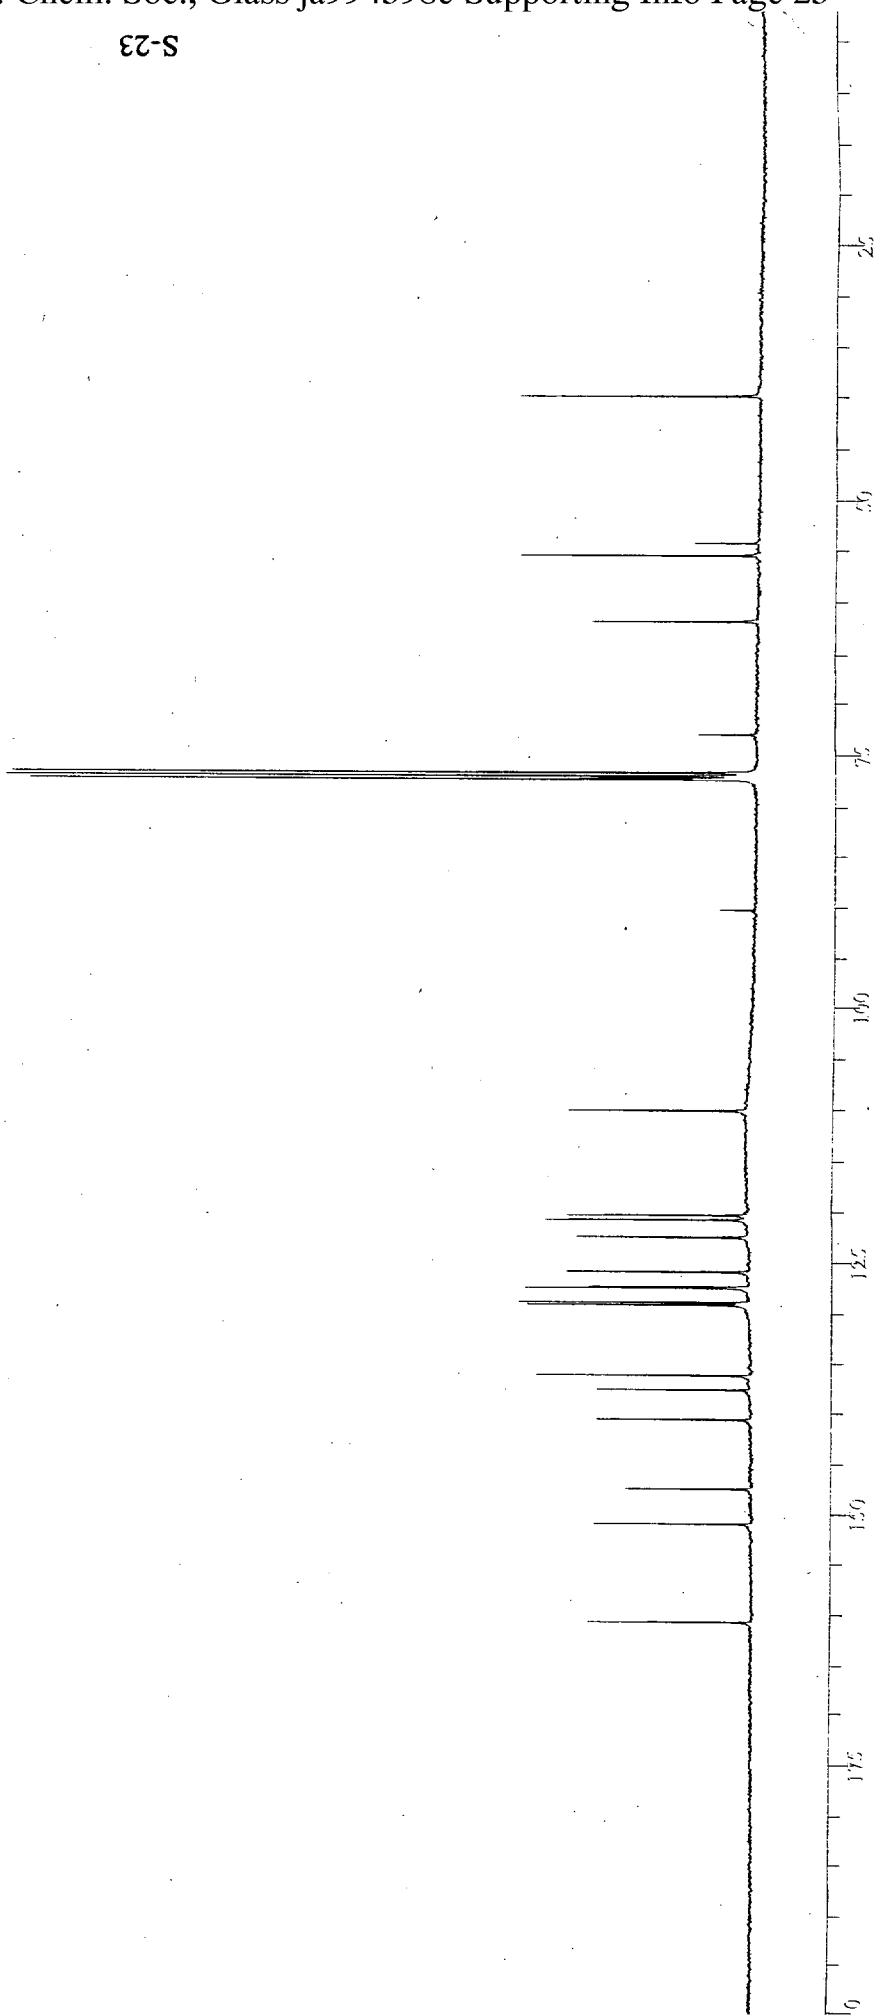

Supplement: Supplementary file 1 [file 5768541]
